# 1 **Evidence of multifaceted functions of codon usage in translation within the model beetle *Tribolium*** 2 ***castaneum***

3 Authors: Carrie A. Whittle<sup>1</sup>, Arpita Kulkarni<sup>1</sup>, Cassandra G. Extavour<sup>1,2</sup>

4 1. Department of Organismic and Evolutionary Biology, Harvard University, 16 Divinity Avenue,  
5 Cambridge MA 02138, USA Phone: 617-495-1564

6 2. Department of Molecular and Cellular Biology, Harvard University, 16 Divinity Avenue,  
7 Cambridge MA 02138, USA

8 Corresponding Author: Cassandra Extavour, Email: [extavour@oeb.harvard.edu](mailto:extavour@oeb.harvard.edu)

9 Running title: Codon use shapes translation in beetles

10

## 11 **Abstract**

12         Synonymous codon use is non-random. Codons most used in highly transcribed genes, often called optimal  
13 codons, typically have high gene counts of matching tRNA genes (tRNA abundance) and promote accurate and/or  
14 efficient translation. Non-optimal codons, those least used in highly expressed genes, may also affect translation. In  
15 multicellular organisms, codon optimality may vary among tissues. At present however, codon use remains poorly  
16 understood in multicellular organisms. Here, we studied codon usage of genes highly transcribed in germ line (testis,  
17 ovary) and somatic tissues (gonadectomized males and females) of the beetle *Tribolium castaneum*. The results  
18 demonstrate that: 1) the majority of optimal codons were organism-wide, the same in all tissues, and had numerous  
19 matching tRNA gene copies (Opt-codon<sub>tRNAs</sub>), consistent with translational selection; 2) some optimal codons varied  
20 among tissues, suggesting tissue-specific tRNA populations; 3) wobble tRNA were required for translation of certain  
21 optimal codons (Opt-codon<sub>wobble</sub>), possibly allowing precise translation and/or protein folding; and 4) remarkably, some  
22 non-optimal codons had abundant tRNA genes (Nonopt-codon<sub>tRNAs</sub>), and genes using those codons were tightly linked  
23 to ribosomal and stress-response functions. Thus, Nonopt-codon<sub>tRNAs</sub> codons may regulate translation of specific genes.  
24 Together, the evidence suggests that codon use and tRNA genes regulate multiple translational processes in *T.*  
25 *castaneum*.

26 **Keywords:** Optimal codons, non-optimal codons, translational selection, translation regulation, tRNA genes

27

## 28 **1. Introduction**

29         In protein coding genes, the synonymous codons of amino acids are not used randomly. Biases in codon usage  
30 are thought to result from selection for translational efficiency and/or accuracy.<sup>1-9</sup> Mutational pressures can also shape  
31 codon usage.<sup>5,10-13</sup> Translational selection in many organisms has been supported by findings that the highly transcribed  
32 genes preferentially use a subset of codons, often described as “optimal” codons,<sup>2,6,12-18</sup> and has been observed in  
33 bacteria,<sup>5,6,17</sup> fungi,<sup>16,19,20</sup> plants<sup>2,14,21</sup> and animals, including spiders<sup>22</sup> and insects (e.g., *Drosophila*, *Aedes*, *Anopheles*,  
34 *Gryllus*, *Oncopeltus*, and weakly observed in *Bombyx*<sup>2,15,23-27</sup>). Whole-genome data show that optimal codons typically  
35 have correspondingly high numbers of iso-accepting tRNA gene copies in the genome, reflecting an organism’s relative  
36 tRNA abundance,<sup>1,5,6,19,20,28</sup> and is consistent with selection for translational optimization.<sup>1,4,5,18,20,29-33</sup> The utility of

37 tRNA gene number to quantify organismal tRNA abundance has been supported *in vivo* in bacteria and eukaryotes.<sup>28,34,35</sup>  
38 For instance, the addition of tRNA genes for a codon of a specific amino acid to the *E. coli* genome markedly improved  
39 translation rates of genes containing that amino acid.<sup>28</sup> In this regard, the increased use of optimal codons in highly  
40 transcribed genes,<sup>2,5,14</sup> and the correspondence of these codons to abundant tRNA genes,<sup>1,4</sup> suggest that selection may  
41 favor optimization for cost efficient and/or accurate translation.

42 In contrast to unicellular systems, in multicellular organisms measuring codon usage can be complicated by the  
43 plurality of tissues, as optimal codons and tRNA populations may vary among tissue types.<sup>36-38</sup> For instance, cellular  
44 tRNA abundances can vary among tissues or cell types for at least some codons,<sup>37,39,40</sup> suggesting that translational  
45 selection may differ among tissues.<sup>37</sup> This has also been supported by findings of some variation in codon use of genes  
46 transcribed in different tissues in the few organisms studied to date. For example, in the plant *Arabidopsis* the use of  
47 specific codons in a gene depends on the tissue type in which it is maximally expressed, suggesting this species has  
48 localized tRNA populations,<sup>38</sup> a pattern that has also been proposed for rice.<sup>41</sup> Although similar studies in metazoans  
49 have been rare, a recent investigation in *D. melanogaster* showed that codons associated with elevated expression were  
50 not universal across tissues. For example, AAT was more commonly used than AAC for Asn in some tissues (e.g., testis,  
51 hindgut), while TGT was favored over TGC for Cys in the salivary glands, that was suggested to provide evidence of  
52 tissue-specific tRNA populations.<sup>36</sup> Additional studies are warranted to determine the universality of distinct optimal  
53 codon identities in various tissues of an organism. In particular, the germ line and somatic tissues comprise contrasts of  
54 significant interest, as the former directly determines an organism's reproductive success and fitness and experiences  
55 haploid selection in the meiotic and sex cells, such that translational optimization may be particularly relevant to those  
56 tissues.

57 While much attention has been focused on optimal codons in the literature, growing experimental research,  
58 largely from single-celled models or *in vitro* systems, suggests that non-optimal codons, those codons least used in  
59 highly transcribed genes (and/or codons defined as "rare" in some studies), can also play significant regulatory roles in  
60 translation.<sup>34,42,43</sup> In yeast for example, it was shown that cells altered their tRNA populations under stress and had  
61 increased levels of tRNAs that matched the rare codons found in stress-response genes, thus allowing the preferential  
62 translation of those mRNAs under stressful conditions, without any change in mRNA abundance.<sup>44</sup> Findings in  
63 cyanobacteria have indicated that circadian rhythms are regulated post-transcriptionally based on non-optimized codon  
64 use in genes of the *kaiABC1* cluster.<sup>45</sup> Further, non-optimal codons have been shown to slow rates of translational  
65 elongation and to control ribosome traffic on mRNA, which allows proper co-translational protein folding and/or  
66 functionality, based on *in vitro* cell-free translation systems from *Neurospora*<sup>7</sup> and *Drosophila*.<sup>9</sup> Non-optimal codons  
67 have also been found to facilitate co-translational protein folding in various yeast models.<sup>46</sup> These data show that the use  
68 of one or a few types of rare codon(s) in a gene may markedly affect its translation, depending on the tRNA pool,  
69 suggesting that the supply-demand relationship between non-optimal codons and their matching tRNA abundances could  
70 comprise an adaptive mechanism of translational regulation.<sup>34,44-48</sup> To further understand this phenomenon, genomics and  
71 molecular evolution research on codon usage patterns in animal systems should expand beyond the typical focus on  
72 optimal codons, and specifically include assessments of non-optimal codons, and their relationships to tRNA genes.

73 In addition to non-optimal codons *per se*, some studies have indicated that the use of codons that have no  
74 matching tRNA, and obligately require wobble codon-anticodon tRNAs (wobbly at the third nucleotide of the codon)  
75 may also influence translation.<sup>34</sup> For instance, an investigation in four divergent eukaryotes found that the relative  
76 translation levels of cell-cycling gene mRNAs during various stages of the cell cycle depended on the frequency of  
77 codons that had no corresponding tRNA gene copies in the genome and thus required wobble tRNA.<sup>49</sup> Further,  
78 experimental research in yeast, human cells, and nematodes has shown that obligatory use of wobble tRNA decelerates  
79 translational elongation by slowing ribosomal translocation on the mRNA.<sup>34,50,51</sup> In this regard, the use of codons that  
80 require wobble tRNA could have a significant effect on translational dynamics, particularly in slowing translation,<sup>34</sup> and  
81 thus should also be considered in studies of codon usage patterns in an organism.

82 A metazoan species providing a promising pathway for the comprehensive study of codon usage in a  
83 multicellular system is the Coleopteran rust red flour beetle *Tribolium castaneum*. *T. castaneum* is a long standing model  
84 for genetics and developmental biology, has a well characterized genome,<sup>18,52,53</sup> and is estimated to have diverged from  
85 the fellow insect *Drosophila* approximately 300 Mya.<sup>54-58</sup> While a prior pioneering study had identified a putative list of  
86 optimal codons for *T. castaneum*,<sup>18</sup> the approach used in that study involved correlation analyses between codon  
87 frequency and expression level. Given that this method has been thought to often be poorly suited to revealing optimal  
88 codons, defined as those most common in highly transcribed genes,<sup>1,5,59</sup> analyses of codon use in this taxon would benefit  
89 from being revisited with alternative methods. Optimal codons can be most readily revealed via direct contrasts of codon  
90 usage in the highest versus lowest expressed genes in the genome, also known as the contrast method.<sup>2,13-17,21,24,59</sup> At  
91 present, like most multicellular model organisms, a multifaceted integrative approach has not yet been applied to  
92 assessments of codon usage in this beetle taxon, including the identification of optimal and non-optimal codons in highly  
93 transcribed genes at an organism-wide level, and within the somatic versus germ line tissues, nor have assessments been  
94 available of the links between such codon usage and tRNA gene counts, wobble tRNA, and gene functionality.

95 In the present study, we address these outstanding issues on codon usage in *T. castaneum* using genome-wide  
96 protein-sequence datasets (CDS) and large-scale transcriptome datasets from the male and female germ lines and somatic  
97 tissues (testes, ovaries, gonadectomized (GT-) males and GT-females).<sup>60</sup> From these data, we rigorously study optimal  
98 and non-optimal codons in this taxon, and their relationships to tRNA abundances and gene ontology. From these  
99 analyses, we report strong evidence for organism-wide optimal codons in all four tissue types and both sexes. The  
100 majority of these optimal codons have abundant matching tRNAs (Opt<sub>tRNA</sub> status), consistent with pervasive  
101 translational selection for efficient and/or accurate protein synthesis in this species. A minority of optimal codons vary  
102 among the four tissues, suggesting small, but potentially meaningful, differences in tRNA populations between tissue  
103 types. Crucially, we report that a subset of the optimal codons did not have direct tRNA matches and obligately required  
104 wobble tRNA for translation (Opt-codon<sub>wobble</sub>), which we propose may comprise a mechanism for slowing translation for  
105 accuracy or protein-folding purposes. Finally, we find that a number of non-optimal codons unexpectedly have abundant  
106 perfectly matching tRNA gene copies (Nonopt-codon<sub>tRNAs</sub>) and that these rare codons are preferentially used in genes  
107 with specific functions, including ribosomal protein genes and stress response genes. Thus, we hypothesize that the use  
108 of codons with Nonopt-codon<sub>tRNAs</sub> status may be a potential mechanism to ensure preferential translation of specific

109 gene mRNAs. Collectively, our results reveal the multiple roles of codon usage in this beetle, suggesting not just  
110 pervasive selection for the use of specific codons in highly transcribed genes for efficient and/or accurate translation, but  
111 also translational regulatory roles of wobble codons and of non-optimal codons.

112

## 113 **2. Materials and Methods**

### 114 **2.1. *T. castaneum* CDS**

115 The annotated CDS of our main target species *T. castaneum* (v.5.2) were downloaded from Ensembl Metazoa  
116 (<http://metazoa.ensembl.org>) and are also available at BeetleBase<sup>52,53</sup>). The full CDS per gene (longest CDS per gene,  
117 N=16,434) was used for the study of codon usage. The full genome and its descriptive GFF file was also downloaded for  
118 assessments.

### 119 **2.2. Biological samples and RNA-seq**

120 We aimed to determine the expression level (FPKM) for each of 16,434 genes in *T. castaneum* for germ line and  
121 somatic tissues. For this we used the large-scale RNA-seq datasets for the ovaries, testes, GT-females and GT-males  
122 shown in Supplementary Table S1.<sup>60</sup> The *T. castaneum* specimens were provided by the Brown lab at KSU  
123 (<https://www.k-state.edu/biology/people/tenure/brown/>). Samples were grown under standard conditions until adulthood  
124 and tissue dissections were then performed on unmated adults (a total of 150 animals per sex per biological replicate),  
125 and RNA was extracted and processed for RNA-seq, as described previously.<sup>60</sup>

### 126 **2.3. Gene expression**

127 The RNA-seq reads (76bp) per sample were trimmed of adapters and poor-quality bases using the program  
128 BBduk available from the Joint Genome Initiative (<https://jgi.doe.gov/data-and-tools/bbtools/>) set at default parameters.

129 Gene expression level was determined for the 16,434 genes (CDS) as FPKM after mapping each RNA-seq  
130 dataset per tissue to the full CDS list for each species using Geneious Read Mapper<sup>61</sup>, which yielded highly similar  
131 results as other common mappers such as BBmap (<https://jgi.doe.gov/data-and-tools/bbtools/>). The average FPKM across  
132 samples per tissue type (Supplementary Table S1) was used to measure expression per tissue. FPKM values were highly  
133 correlated between replicates of each sample type (Spearman's Ranked R>0.9, P<2X10<sup>-7</sup>)

### 134 **2.4. Identification of optimal and non-optimal Codons**

135 For identification of the optimal codons, we measured the relative synonymous codon usage (RSCU) per codon  
136 per amino acid for each gene under study using CAICal.<sup>62</sup> RSCU values indicate the relative usage of a codon in a  
137 synonymous codon family, and values >1 and <1 indicate favored and unfavored usage as compared to that expected  
138 under equal usage of all codons respectively, and greater relative RSCU values among codons indicates elevated usage.  
139 For each of the 18 amino acids in the genetic code with synonymous codons (note that Trp and Met only have one codon  
140 each), we identified the optimal codon using the contrast method.<sup>13-15,17,21,24,59,63</sup> For this, we determined the difference in  
141 RSCU ( $\Delta$ RSCU) per codon between genes with the highest 5% versus the lowest 5% expression. The primary optimal  
142 codon for each amino acid was defined as the codon with the highest and statistically significant positive  $\Delta$ RSCU value,  
143 indicating preferred usage in highly transcribed genes.<sup>13-15,17,21,24,59,63</sup> The primary non-optimal codon per amino acid was  
144 defined as the codon with the largest negative and statistically significant  $\Delta$ RSCU value, indicating low usage in highly

145 transcribed genes. Statistical significance per codon was applied using a t-test between RSCU values across all genes for  
146 high versus low expressed genes.

147 As the literature reflects some variation in codon use terminology among studies to date, we explicitly define the  
148 term “optimal codons” herein as those codons most used in highly transcribed genes based on  $\Delta$ RSCU, which infers an  
149 innate advantage of the codon under high transcription. Then, we secondarily assessed each optimal codon’s  
150 correspondence to the number of matching (codon-anticodon) tRNA genes in order to test their role in translational  
151 accuracy/efficiency<sup>1,4,5,18,20,29-33</sup> or to infer possible other functions (e.g., wobble codons for translational slowing). For  
152 non-optimal codons a similar approach was used wherein the non-optimal codon status was identified based solely on  
153  $\Delta$ RSCU, and their relationships to tRNA were then separately assessed.

154 The frequency of optimal codons (Fop) is a measure of the degree of optimal codon usage per gene.<sup>6</sup> Fop was  
155 determined in CodonW<sup>64</sup> using the primary optimal codons identified herein. Fop was also determined using the primary  
156 optimal codons previously identified by Williford and Demuth 2012.<sup>18</sup> As multiple codons per amino acid were classified  
157 as optimal in that assessment, we defined each primary optimal codon from the study as that with the strongest average  
158 positive correlation across tissues for measuring Fop.

159 For an additional layer stringency, we wished to exclude the possibility that expression-mediated mutational-  
160 biases towards specific nucleotides, which have been observed to some extent in certain organisms to date (e.g., *E. coli*,  
161 humans<sup>65,66</sup>), contribute towards codon differences among high and low expressed genes herein. For this, we extracted all  
162 introns for every gene in the genome (those with introns) using the GFF file available (see section 2.1). Introns are  
163 thought to be mostly selectively neutral,<sup>18,67</sup> and thus the nucleotide content should reflect any underlying mutational  
164 pressures in the genome, and on the nucleotide composition of synonymous codons in an organism.<sup>13,18,67</sup> If mutational  
165 pressures on introns are not associated with gene expression level, it will exclude this factor in causing optimal codons in  
166 the highly expressed genes, and further affirm the role of selection. All introns that were >50bp were extracted as the  
167 region between exons and were concatenated per gene. The association between GC content and expression level were  
168 assessed using a scatter plot and Spearman’s ranked R.

## 169 **2.5. Identification of tRNA Genes**

170 To assess whether or how the optimal and non-optimal codons were related to the tRNA gene copy number, we  
171 determined the number of iso-accepting tRNA genes per codon in the genome (*T. castaneum* v. 5.2) using tRNA-scan  
172 SE.<sup>18,53,68</sup> The list of tRNA gene numbers identified in the current genome version was identical to that reported  
173 previously<sup>18</sup> and is shown in Table 1.

## 174 **2.6. GO Functions**

175 The predicted GO functions were determined using Panther<sup>69</sup> using the option for *T. castaneum* as species

## 176 **2.7. Data Availability**

177 The CDS and genome v. 5.2 for *T. castaneum* are available at Ensembl Metazoa (<http://metazoa.ensembl.org>).  
178 RNA-seq data for all samples from *T. castaneum* described in Supplementary Table S1 are available at the SRA database  
179 under Bio-project number PRJNA564136.

180



### 181 3. Results and Discussion

#### 182 3.1. Optimal codons in *T. castaneum*

183 We first report the organism-wide, or global, optimal codon per amino acid for *T. castaneum* using  $\Delta$ RSCU and  
184 the average expression levels of all annotated genes across all four studied tissue types (testis, ovary, GT-male, GT-  
185 female) in Table 1. The primary optimal codon was defined as the codon with the largest positive  $\Delta$ RSCU between  
186 highly and lowly transcribed genes and with  $P < 0.05$ ), was found for 17 of the 18 amino acids with synonymous codons.  
187 Seven primary optimal codons ended in T, three in A, five in C and two in G. We noted that Ile had two codons with  
188 nearly identical  $\Delta$ RSCU values. Further, CAC for His showed signs of optimal codon usage in several individual tissues  
189 (see following section), and including this codon yields a study-wide total of 18 optimal codons (Table 1). The range of  
190  $\Delta$ RSCU values is similar to or larger than that observed in other multicellular eukaryotes, including nematode species,  
191 *Drosophila*, *Populus* and *Neurospora*.<sup>2,14-16</sup> Thus, the patterns in Table 1 are consistent with selection pressures have  
192 favored the use of a specific subset of codons in highly expressed genes<sup>5</sup> (for results on non-optimal codons see section  
193 3.4 below).

194 While the striking use of specific optimal codons in genes under high expression levels in Table 1 in itself  
195 provides evidence of selection on codon usage, we wished to include additional layers of stringency to affirm the role of  
196 selection in favoring these codons. First, we determined the frequency of optimal codons (Fop), a measure of the degree  
197 of optimal codon usage per gene,<sup>6</sup> for all studied genes in the genome (N=16,434). As shown in Fig. 1A, we found that  
198 the Fop increased from genes with low (top 5% in the genome), to moderate (5 to 95%), to high (top 5%) expression  
199 levels (Ranked ANOVA and Dunn's paired test  $P < 0.05$ ). As low and high expressed genes were used to identify the  
200 optimal codons, the Fop was expectedly lowest and highest in those categories of genes respectively. Importantly  
201 however, moderately expressed genes, which were not used to identify the optimal codons, showed intermediate Fop  
202 values, suggesting a genome-wide tendency for greater use of optimal codons in CDS with elevated expression. Second,  
203 as codon usage can vary with protein length in some eukaryotes,<sup>2,5,70</sup> we repeated the assessment in Fig. 1A using genes  
204 with similar CDS lengths, which we binned into short (<150 codons), medium ( $\geq 150$ , <300), and long CDS ( $\geq 300$ ). For  
205 each of these three length categories, we found the same stepwise increase of Fop values with expression level (Ranked-  
206 ANOVAs  $P < 0.001$ ). Thus, the link between expression and optimal codons cannot be explained by protein length. Third,  
207 from examination of introns, wherein nucleotide content is mostly shaped by mutational pressures,<sup>18,67,71</sup> we found that  
208 the GC (and thus AT) content of introns was uncorrelated to gene expression level (Spearman's correlation  $R = -0.09$ ,  
209 Fig. 1B),<sup>72,73</sup> and thus indicates an absence of expression-mediated mutational biases<sup>12,65,66,71</sup> in this species. Further to  
210 this point, unlike some organisms wherein optimal codons typically end in only two or three types of nucleotides,<sup>2,14,21,24</sup>  
211 all four nucleotides are represented at the terminal position of optimal codons of this species (Table 1); this also excludes  
212 mutational biases in shaping the optimal codons in highly transcribed genes in this taxon.<sup>5</sup> Taken together, while we do  
213 not exclude the possibility that non-selective (mutational) mechanisms may contribute toward codon use of genes,  
214 particularly those under low or even moderate expression,<sup>74</sup> our observations indicate that a history of selection pressures  
215 likely plays a significant role in shaping the codon use of the most highly transcribed genes in this organism (top 5%  
216 expression), shown in Table 1.

### 217 **3.2. Most, but not all, optimal codons are the same across germ line and somatic tissues**

218 In order to compare optimal codon usage among the tissues under study, we next determined the optimal codons  
219 (using  $\Delta$ RSCU) using genes with high versus low expression (top and lowest 5%) separately for each of the four  
220 individual tissue types, ovaries, testes, GT-females and GT-males. For rigor in this assessment, we identified the subset  
221 of genes in the top 5% expression class that were only in the top category for one tissue type (and were not in the top 5%  
222 expression in any of the other three tissues), to discern whether or not there was a tissue effect on optimal codons. Under  
223 these criteria, we identified 372, 450, 444, and 272 genes for analysis, for ovaries, testes, GT-females and GT-males  
224 respectively. This allowed us to specifically assess the codon usage of genes that were maximally transcribed only in one  
225 individual tissue, as it has been found that if tissue-type has an effect on codon use, this effect is most apt to be evident in  
226 its highly transcribed genes<sup>38</sup>. The results for  $\Delta$ RSCU per tissue type are shown in Table 1. We report that 15 of the 18  
227 primary optimal codons (including His) from the organism-wide assessment were identified as having the same optimal  
228 codon in three, or all four, of the individual tissue-types (Table 1). Thus, the vast majority of primary optimal codons  
229 were the same in these divergent tissues, including male and female germ lines and somatic tissue types.

230 However, several significant differences were also observed among tissues. For example, a male-specific  
231 primary optimal codon was identified for the amino acid Phe (with two synonymous codons), as the codon TTC was  
232 optimal in the testes and GT-males, but not in the ovaries or GT-females (Table 1). Similarly, a GT-male-specific  
233 primary optimal codon ATC was identified for Ile (with three synonymous codons), where ATT was optimal for the  
234 other three tissues. In turn, an ovary-specific optimal codon was evident for Pro (with four synonymous codons), as the  
235 primary optimal codon was CCC in all tissues except for the ovaries, where it was CCT. In addition, a GT-female  
236 optimal codon was identified for Lys (two synonymous codons), where AAG was optimal in the ovaries, testes, and GT-  
237 males, but its alternate codon AAA was optimal for GT-females. These examples show that the primary optimal codon  
238 varies among tissue types in this beetle, and thus this pattern suggests that translational selection regimes, and thus  
239 corresponding tRNA populations may also vary among tissues.<sup>36</sup> Further, it is worth noting that in some cases there may  
240 be tissue-specific preferences for codons using wobble tRNA (e.g., ATC for Ile in GT-males, see section 3.3).

241 These present results are consistent with the few available studies of tissue-specific codon usages and  
242 translational selection from the fellow insect *D. melanogaster*<sup>36</sup> and in studied plants<sup>38,41</sup> (note that although some  
243 evidence suggests humans have tissue-specific optimal codons, this has been debated, and may largely be an effect of the  
244 GC content of isochores, which exist in those organisms<sup>75,76</sup>). Together, while the vast majority of optimal codons are  
245 shared across tissues in these beetles, non-negligible differences are observed between tissues and sexes. Direct  
246 quantification of tRNAs in cells or tissues has been mostly restricted to date to lab models of bacteria, yeast or *in vitro*  
247 human cell lines,<sup>37,39,40,44,77</sup> and the accuracy and limitations of the various approaches (based on microarrays, Northern  
248 blot, quantitative PCR, RNA-seq) remains debated<sup>40,44,78,79</sup>. Nevertheless, the development of robust methods to sequence  
249 tRNAs that are applicable to non-traditional model organisms will allow further tests of whether or how tRNA  
250 expression levels vary with tissues in *T. castaneum*, as is strongly suggested by these results.<sup>36</sup>

### 251 **3.3. A majority of organism-wide optimal codons have high tRNA gene copy numbers**

252 Given the minimal differences among tissues, for our remaining analyses we focus on the organism-wide  
253 optimal codon usages (Table 1). The number of tRNA gene copies in the genome has commonly been used as a measure  
254 of the relative abundance of each tRNA species.<sup>1,4,18,20,29,30,49</sup> If optimal codon usage were consistently a result of  
255 selection in response to abundant tRNAs, then the primary optimal codon per amino acid should also have high relative  
256 tRNA gene frequency (Opt-codon<sub>tRNAs</sub> status). When using the organism-wide optimal codon list (Table 1), we found  
257 that 12 of the primary optimal codons also had the highest, or near the highest tRNA gene counts of all codons per amino  
258 acid, GCT (Ala), AGA (Arg), AAC (Asn), CAA (Gln), GAA (Glu), ATT (Ile), TTG (Leu), AAG (Lys), TTC (Phe), ACT  
259 (Thr), TAC (Tyr), and GTT (Val). Further, while the positive  $\Delta$ RSCU of CAC for His was not statistically significant  
260 using the organism-wide assessment (P=0.26), this codon was optimal when individually considered in the ovaries, GT-  
261 females and GT-males (P<0.05), and had seven matching tRNA genes. Thus, when including CAC for His as a codon  
262 with optimal status, yields a study-wide total of 13 of the 18 primary optimal codons that have plentiful matching tRNA  
263 genes. In other words, a majority of optimal codons have Opt<sub>tRNA</sub> status. These results strongly suggest translational  
264 selection for accuracy and/or efficiency<sup>1,4</sup> across a majority of amino acids in this beetle.

265 ***Hypothesis 1: Optimal codons use wobble tRNA to resolve conflict of high translation with sequence fidelity***

266 While 13 optimal codons had a high number of direct tRNA matches as expected under selection for  
267 optimization of efficient and accurate translation, for the remaining five amino acids, a much different pattern was  
268 observed. Specifically, the primary optimal codon (highly used in abundant transcripts) had no direct matching tRNA-  
269 genes, and a wobble tRNA (shown in Table 1) must thus be employed for translation of these codons (denoted as Opt-  
270 codon<sub>wobble</sub>). For instance, Opt-codon<sub>wobble</sub> status was observed for the amino acids Asp (GAT), Cys (TGT), Gly (GGT),  
271 Pro (CCC) and Ser (AGT). Thus, this result shows that while these identified optimal codons are preferred in highly  
272 transcribed genes, their innate benefit cannot be due to having abundant direct matching tRNA, and thus another  
273 mechanism must explain their high usage. Further, as shown in Supplementary Text File 1 and Fig. S1, within the group  
274 of highly transcribed genes, each of these five individual codons with Opt-codon<sub>wobble</sub> status showed strong associations  
275 with protein length, inferring putatively significant roles of the use of these types of codons in the translation of abundant  
276 mRNAs, which may vary with the length of the translated sequence.

277 Experimental studies in bacteria and eukaryotic models have shown that codons using wobble tRNA act to slow  
278 translation by decelerating the translocation of ribosomes on mRNA.<sup>34,50,51</sup> In addition, a study of the genomes of various  
279 eukaryotes (humans, yeast, *Arabidopsis*) have indicated that cell-cycle genes had high usage of codons that had no  
280 matching tRNA genes in the genome, and thus must employ wobble tRNA, which inherently have lower codon-  
281 anticodon binding affinity than those codons with perfect matches.<sup>49</sup> The differential use of codons using wobble tRNA  
282 in cell-cycle genes, combined with potential oscillations in tRNA abundances, were proposed to differentially regulate  
283 the translation rates of gene mRNAs during various stages of the cell cycle.<sup>49</sup> Further, this was speculated to possibly  
284 comprise a broader evolutionarily conserved phenomenon for translational regulation in eukaryotes.<sup>49</sup> In addition, the  
285 usage of wobble-tRNAs in a gene could have some parallel functions to the use of non-optimal codons with low tRNA  
286 abundance (Nonopt-codon<sub>tRNAs</sub>; see Table 1 for Nonoptimal codons with few tRNAs) which can prevent jamming of  
287 multiple ribosomes during the initiation of translation,<sup>35</sup> and/or slow or pause translation during elongation, which would



288 facilitate accurate protein-folding.<sup>7,9,39,80</sup> In this regard, the results from these various studies suggest that the slowing of  
289 translation that is induced by wobble-tRNA<sup>34,50,51</sup> could comprise an evolutionarily conserved mechanism shaping  
290 various aspects of translation.

291 Significantly, a key modification that mediates wobbling at the first anticodon position (position 34 of the  
292 anticodon loop) is for A34, which may be enzymatically deaminated by adenosine deaminase tRNA (ADATs) to form  
293 inosine (I34). The I34 can pair with mRNA 3'codon bases A, C, or U in Eukarya<sup>81,82</sup> (see also for an A37 ADAT  
294 (*Adat1*) in *D. melanogaster*<sup>83</sup>). For A34 modifications in eukaryotes, available research to date suggests that deamination  
295 requires the ADAT2/ADAT3 (hetADAT) enzymes, which are thought to allow A34 modifications across diverse  
296 eukaryotic systems.<sup>81,84</sup> This modification would be essential for some codons obligately requiring wobble tRNA (those  
297 with no matching tRNAs, and no matching unmodified wobble tRNAs) in the highly transcribed genes studied here,  
298 including with Opt-codon<sub>wobble</sub> status (e.g., Pro, CCC, Table 1). Thus, in addition to wobble codons using unmodified  
299 tRNAs, further functional study of ADATs is warranted in model insects, such as *T. castaneum*, including possible  
300 variation in expression and activity among tissues, in order to help to further ascertain the potential consequences of use  
301 of wobble codons requiring tRNA modification at A34 on translation rates and protein folding.<sup>42,81,84</sup>

302 Taken together, we hypothesize here that for this beetle, the use of codons with Opt-codon<sub>wobble</sub> status in highly  
303 expressed genes comprises a mechanism to slow or pause translation at various sites, which may lead to increased  
304 accuracy of translation or allow co-translational protein folding,<sup>50</sup>. In addition, the high frequency of five specific codons  
305 with Opt-codon<sub>wobble</sub> status in genes with abundant mRNAs (Table 1), suggests that these codons might also play a  
306 significant role in post-transcriptional differential regulation of protein levels<sup>49</sup> in these beetles. Additional studies of  
307 protein levels of genes with high usage of codons with Opt-codon<sub>wobble</sub> status will be needed to further test this aspect of  
308 the hypothesis.

### 309 **3.4. Certain non-optimal codons have abundant tRNA genes**

310 Herein, we defined the primary non-optimal codon per amino acid stringently as the codon with the largest  
311 negative  $\Delta$ RSCU per amino acid, rather than simply all codons that were not optimal. Using these data, we assessed  
312 whether those codons with low usage in highly transcribed genes also exhibit few tRNA gene copies, as might be  
313 expected if codon usage is mostly shaped by translational selection for efficient and accurate translation (i.e., for  
314 adaptation of optimal codons and tRNA abundance). The organism-wide primary non-optimal codons (per amino acid)  
315 are shown in Table 1.

316 The results showed that some non-optimal codons, as expected, had low numbers of matching tRNA genes  
317 (Nonopt-codon<sub>tRNAs</sub> status, e.g., two tRNA genes for ACG (Thr), ATA (Ile), and TTA (Leu), one for CCG (Pro)).  
318 Unexpectedly, however, certain non-optimal codons had relatively moderate to high tRNA gene abundance (denoted as  
319 Nonopt-codon<sub>tRNAs</sub>). For instance, for Arg, whilst the codon CGG had no tRNA gene copies, its sister non-optimal  
320 codon CGA ( $\Delta$ RSCU= -0.290 and -0.265 respectively) had four tRNA gene matches. For Gly, both the primary and  
321 secondary non-optimal codons GGC and GGA (-0.104 and -0.077 respectively) had eight and 15 matching tRNA gene  
322 copies respectively. For Val, the primary non-optimal codon GTA had five tRNA genes, only slightly lower than the  
323 seven observed for its optimal codon GTT. We noted, that if we relaxed our definition of a non-optimal codon to

324 consider any codon that is not optimal, we found that some of those codons also had many corresponding tRNA genes.  
325 For example, for Pro the non-optimal codon CCA (which had a weak and nonsignificant positive  $\Delta$ RSCU value, +0.029,  
326 and thus would not have satisfied our strict definition of having the largest negative  $\Delta$ RSCU for this amino acid) had 13  
327 tRNA genes, an extraordinarily high value compared with other codons. Moreover, for Asp, the (less stringently) defined  
328 non-optimal codon GAC had ten matching tRNA copies. Collectively, it is evident that codons that are not the optimal  
329 codons in this taxon are not inevitably linked to a low abundance of matching tRNA genes, and rather in some cases  
330 exhibit high matching tRNA gene counts. Thus, these patterns suggest it is possible that non-optimal codons with  
331 elevated tRNAs play a specific regulatory role for highly transcribed genes.

332 A recent study in yeast has indicated that stress genes may preferentially use non-optimal codons that have  
333 abundant iso-accepting tRNA genes, to increase effective gene expression by promoting their translation over other  
334 proteins rather than affecting mRNA levels.<sup>44</sup> Based on this notion, we hypothesize here that codons with Nonopt-  
335 codon<sub>tRNAs</sub> status in *T. castaneum* may regulate the translation of abundant mRNAs of proteins with specific functions in  
336 this beetle. To further evaluate this possibility, we examined the predicted gene ontology functions of the highly  
337 transcribed genes that had relatively elevated usage of non-optimal codons with abundant matching tRNAs.

338

### 339 ***Hypothesis 2: Non-optimal codons post-transcriptionally regulate translation based on protein functions***

340 We assessed the GO functions of highly transcribed genes (top 5% in the genome from the organism-wide  
341 analyses across all four tissues, N=822; and a cutoff of 103.3 FPKM) that had relatively elevated use of codons with  
342 Nonopt-codon<sub>tRNAs</sub> status (Table 1). For this assessment, rather than assess all strictly defined non-optimal codons, we  
343 chose as examples the codons GGC for Gly, GTA for Val, and CGA for Arg. These three codons were defined as non-  
344 optimal by our strict definition (having a large negative and statistically significant  $\Delta$ RSCU, Table 1) and had substantial  
345 matching tRNA gene copy counts (four to eight tRNA genes each). These codons also had negative  $\Delta$ RSCU values in all  
346 four of the tissue types studied (Table 1), indicating they consistently have non-favored status in this organism.

347 For the amino acid Gly, we identified those highly transcribed genes that had RSCU values for GGC of >1.5. An  
348 RSCU value of one is expected for each of the four Gly codons under equal usage, and thus values of 1.5 to 4 for GGC  
349 are relatively high. Thus, while Nonopt-codon<sub>tRNAs</sub> are by definition rare in highly expressed genes, this approach  
350 allowed us to specifically examine the functions of this group (of highly expressed genes) that had unusually elevated use  
351 (RSCU) of this codon with Nonopt-codon<sub>tRNAs</sub> status. A total of 20.4% of the highly transcribed gene set was in this  
352 class. As shown in Table 2, these genes included those involved in oxidative stress response, such as Peroxiredoxin, and  
353 those involved in olfactory activity. Thus, we speculate that these types of genes, which use codons with Nonopt-  
354 codon<sub>tRNAs</sub> status, will exhibit less tRNA competition during translation elongation than those genes that use codons  
355 with few or no matching tRNA genes, such as the fellow Gly codon GGG (with only one tRNA match), or even those  
356 genes using non-optimal codons for other amino acids, such as CCG for Pro (with one tRNA match) (Table 1). In  
357 addition, we found that genes with elevated GGC frequency encoded numerous (N=15) ribosomal proteins. Thus, this  
358 finding suggests that usage of the non-optimal codon GGC may shape translation via a second mechanism: namely, by  
359 shaping the cellular abundance of specific ribosomal proteins *per se*, which are needed for translation. In this regard, the

360 non-optimal codon usage profiles in Gly appear consistent with a hypothesis wherein the usage of GGC regulates the  
361 translation of a subset of genes in this taxon, and may even regulate translation rates *per se* via effects on certain  
362 ribosomal proteins.

363 In terms of Val, those genes with high expression (top 5% in the genome), very rarely used the identified  
364 primary non-optimal codon GTA. In fact, only 5.1% of the 822 highly transcribed genes had GTA RSCU values >1.5, an  
365 extraordinarily low frequency. Those that did exhibit RSCU values >1.5 included genes involved in cytoskeleton  
366 functions and actin synthesis, such as Cofilin/actin-depolymerizing factor homolog-like protein and profilin, as well as a  
367 p53-related cell death protein, and a number of uncharacterized proteins (Table 2). For Arg, which has six synonymous  
368 codons, genes with RSCU values >1.5 for the non-optimal codon CGA included genes involved in olfactory signaling  
369 and with cytoskeleton roles (Table 2). It is particularly noteworthy that unlike the genes with elevated RSCU for GGC  
370 (Gly), which included abundant ribosomal protein genes, no ribosomal protein genes were among those with elevated  
371 frequency of GTA in Val or CGA for Arg. Thus, the ribosomal proteins in particular appear to be strongly connected to  
372 the usage of the non-optimal GGC Gly codon, and thus we speculate that this codon may be particularly essential to their  
373 regulation.

374 As mentioned above, prior data have suggested that non-optimal codons, when combined with low tRNA  
375 abundance, can play important regulatory roles by preventing the jamming of multiple ribosomes during initiation of  
376 translation, or slowing translation elongation and facilitating precise protein-folding.<sup>7,9,35,39,80</sup> The present study,  
377 however, shows an additional, and much different, plausible effect of non-optimal codons in *T. castaneum*. Specifically,  
378 we show that the use of non-optimal codons with abundant tRNA genes (Nonopt-codon<sub>↑tRNAs</sub>) is tightly linked to  
379 predicted gene functionality (Table 2), and thus these codons may be likely to contribute to the preferential translation of  
380 mRNAs of specific types of genes. This notion agrees with recent experimental data in yeast suggesting that non-optimal  
381 or rare codons in stress genes promote the preferential translation of their mRNA in cells in response to stress-induced  
382 changes in tRNA pools.<sup>44</sup> Thus, this comprises a potential mechanism for preferential translation of specific mRNA.  
383 Herein, however, given that abundant tRNA gene copies are available in the genome for codons with Nonopt-codon<sub>↑tRNAs</sub>  
384 status (and thus tRNAs should be consistently abundant in cells), we speculate that the use of these non-optimal codons  
385 in certain ribosomal protein and stress genes (Table 2) likely acts as a mechanism to ensure their preferential translation  
386 among the various mRNAs within cells at an organism-wide level, perhaps independent of environmental or tissue-  
387 specific fluctuations in tRNA levels.

388 Collectively, our data on codons with Nonopt-codon<sub>↑tRNAs</sub> status add to the growing support for a mechanism  
389 wherein non-optimal or rare codons, combined with elevated tRNA abundances, significantly shape translational  
390 regulation in eukaryotes.<sup>34,44,45,47</sup> Further study in *T. castaneum*, possibly including assessments of protein abundance of  
391 genes with elevated usage of codons with Nonopt-codon<sub>↑tRNAs</sub> status and with high usage of non-optimal codons with  
392 rare tRNA genes, will help unravel the relationships between non-optimal codon usage and translation. In addition, *in*  
393 *vivo* quantification of the tRNA populations in diverse tissue types in this beetle species,<sup>37,39,40,44,77</sup> will help affirm  
394 whether these codons consistently exhibit high tRNA abundances, which could promote their preferential translation at  
395 an organism-wide level.

### 396 **3.5. *T. castaneum* codon usage bias in context**

397 Selection (s) on optimal codons with abundant tRNAs (defined here for those codons with Opt-codon<sub>↑tRNA</sub>  
398 status, and typically denoted as under translational selection), may be influenced by factors such as effective population  
399 size ( $N_e$ ) and genome size. In previous studies, smaller  $N_e$  (or  $N_eS \sim 1$ ; and/or shorter generation times)<sup>85,86</sup> or larger  
400 genomes in eukaryotes have been linked to reduced selection pressures on codon use.<sup>87</sup> For example, using a statistic  
401 aimed to quantify an organism's genome-wide selection on codon usage (using predicted selection pressures per codon  
402 and tRNAs; see also<sup>74</sup>) to compare among species, it was reported that strong selection pressures on codon use occurs for  
403 some bacteria such as *E. coli* (which also have highly skewed RSCU values ( $>2$ ) for some of its codons<sup>88</sup>), with  
404 intermediate pressure in *D. melanogaster* and weak/absent in pressure humans. The authors of that study suggested  
405 that this pattern was related to their (respectively increasing) genome sizes.<sup>87</sup> In this context, the overall translational  
406 selection pressures on optimal codon in *T. castaneum* (Table 1) may be expected to be moderate, and similar to those of  
407 its fellow insect *D. melanogaster* (genome sizes of 160 and 175 MB respectively).<sup>53,89</sup> However, such between-taxon  
408 differences on selected codon bias could also reflect weaker pressure in smaller effective population sizes, which  
409 decrease respectively from bacteria, insects and humans.<sup>85</sup> Nonetheless, our present study is largely focused on the  
410 dynamics of the most highly transcribed (top 5%) genes in the genome in *T. castaneum* (rather than all genes; Table 1),  
411 and includes analyses of not only of the translational selection on optimal codons *per se* (Opt-codon<sub>↑tRNAs</sub> status), but also  
412 putative selection favouring roles of wobble and non-optimal codons (Opt-codon<sub>wobble</sub> and Nonopt-codon<sub>↑tRNAs</sub> status)  
413 and their relationships to tRNAs in shaping translational processes in this taxon. While our data suggest selection has  
414 been a factor in shaping the frequency of each of these types of codons in highly transcribed genes in *T. castaneum*,  
415 further similar studies in more multicellular organisms, including additional *Tribolium* species, will ascertain the breadth  
416 of such patterns across diverse metazoans.

### 417 **3.6. Comparison of Present Optimal Codon List to a Prior Report**

418 On a final note, it is worthwhile to mention here that the optimal codon list we present in Table 1 differs from  
419 that previously reported in *T. castaneum*.<sup>18</sup> The previous report used a correlation method to determine optimal codons,  
420 and a comparison of the present primary optimal codon list in Table 1 (for the whole organism analyses) to those earlier  
421 findings is shown in Supplementary Table S2. We found that only nine of the 18 primary optimal codons identified  
422 herein, were also identified as optimal by the previous study under the correlation method<sup>18</sup>, even when we used very  
423 loose criteria for defining a match to that prior assessment (that is, considering all optimal codons that were defined at  
424 any level under the correlation method, regardless of whether they were the primary, secondary, or tertiary optimal  
425 codon<sup>18</sup>, as a match to our primary optimal codon). It has been previously argued that the use of a correlation approach  
426 can often yield a misleading list of optimal codons.<sup>59</sup> Further, the R values observed for the codons defined as optimal  
427 using the prior correlation method were typically  $<0.1$  (the highest value was 0.237, Supplementary Table S2)<sup>18</sup>. A range  
428 of such low values, even when statistically significant, is sometimes considered a very weak or absent correlation  
429 ( $R < 0.3$ ),<sup>72,73</sup> and thus may not be conducive to revealing codons most often used in highly transcribed genes, as was the  
430 goal here. Moreover, we found that increased gene expression level (organism-wide expression) was not positively  
431 connected to the Fop when using the optimal codons (primary optimal codon defined as strongest correlation) identified

432 under the prior correlation method.<sup>18</sup> Rather, as shown in Supplementary Fig. S2, we found only mild variation in Fop  
433 among expression classes, and Fop was reduced in low and high expressed genes as compared to moderately expressed  
434 (Ranked ANOVA and Dunn's  $P < 0.05$ ), trends inconsistent with a persistent connection between Fop and expression  
435 level. However, we did find a strong connection between expression level and Fop using the optimal codons identified  
436 herein (Table 1, Fig. 1A). The method of employing  $\Delta$ RSCU between high and low expressed genes has repeatedly been  
437 shown effective for specifically revealing the optimal codons, defined as those preferentially used in the most highly  
438 transcribed genes in the genome,<sup>14,15,17,21,24,59</sup> as was the present objective. Thus, the optimal codons defined herein are  
439 those most often used in highly transcribed genes, and were used for all our analyses (Table 1).

### 440 3.7. Conclusions

441 The present study has revealed the complex dynamics of codon usage in the multicellular beetle model system  
442 *T. castaneum*. We found that the majority of optimal codons in this animal model are shared at the organism-wide level  
443 and match tRNA with abundant gene copies, supporting the presence of species-wide translational selection for efficient  
444 and/or accurate translation. However, we also showed that a non-negligible subset of optimal codons varied among the  
445 four tissue types, suggesting a likelihood of tissue- and sex-specific tRNA populations, and thus localized translational  
446 selection. Based on codon optimality status and tRNA gene copies, we propose two hypotheses. The first hypothesis  
447 suggests that the usage of codons with Opt-codon<sub>wobble</sub> status in highly transcribed genes in this beetle has evolved as a  
448 mechanism that slows translation, which could increase precision of translation and/or protein folding. The second  
449 hypothesis proposes that usage of codons with Nonopt-codon<sub>↑tRNAs</sub> status is as a mechanism that promotes high  
450 translation of mRNA of genes with specific cellular functions, which we show here to include stress response and  
451 ribosomal protein genes.

452 Further study in *T. castaneum*, including assessments of cellular protein levels of genes using codons with Opt-  
453 codon<sub>wobble</sub> and Nonopt-codon<sub>↑tRNAs</sub> status in germ line and somatic tissues, will help further unravel their potential roles  
454 in translation regulation. In addition, *in vivo* quantification of the tRNA populations in various tissue types and under  
455 stressful conditions in this beetle, as this methodology improves,<sup>37,39,40,44,77,78</sup> will provide additional valuable insights  
456 into tRNA population stability and variation between tissues.

457 While our data suggest that the frequency of specific codons in *T. castaneum* obligately requiring wobble tRNA,  
458 similar to those non-optimal codons with few tRNAs, may be linked to translational slowing or protein-folding functions  
459 in highly transcribed genes, future follow-up studies should assess whether such codons cluster or show original use  
460 patterns at or near protein (folding) structural elements, which some research suggests may occur in certain  
461 organisms<sup>7,9,46,90-92</sup>, and/or whether those codons may effectively slow or pause translation.<sup>7,9,50</sup> In an understudied  
462 metazoan model such as *T. castaneum*, the former may be achieved via comprehensive bioinformatics analysis of protein  
463 structural properties and codon use,<sup>46,91</sup> and/or the development of a cell-free translation system allowing manipulation of  
464 codon use in mRNAs such those from *Neurospora* and *Drosophila*,<sup>7,9</sup> while the latter may be informed by ribosomal  
465 profiling analyses during translation.<sup>7,9,50</sup> Population-level approaches will also be valuable to further ascertaining the  
466 selection pressures acting on codon use,<sup>86,88,93</sup> particularly research on the mutational spectra of codons with Opt-



467 codon<sub>↑tRNAs</sub>, Opt-codon<sub>wobble</sub> and Nonopt-codon<sub>↑tRNAs</sub> status, to ascertain whether such codon mutations show signals of  
468 selection favouring their fixation in highly transcribed genes of *T. castaneum*.

469 At present, most non-traditional multicellular organisms have not had as many protocols optimized for lab-based  
470 experimental or transgenic research of codon optimization, including rates of translation elongation, protein folding,  
471 tRNA-charging, or codon-anticodon tRNA binding, as compared to the established widely studied single-celled models  
472 or *in vitro* cell lines.<sup>7,28,34,51</sup> We have shown here, however, using the species *T. castaneum*, that a multifaceted approach  
473 using analyses of gene expression, tRNA genes, tissue-type, and gene functionality can be used to suggest how codon  
474 usage shapes translational optimization and regulation in a metazoan system.

475

## 476 Acknowledgments

477 The authors thank Prof. Sue Brown at KSU for generously providing samples of *T. castaneum* for this study.  
478 This work was supported by funds from Harvard University. Thanks also to the Extavour lab members for discussions  
479 and the Bauer core sequencing facility at Harvard for generating RNA-seq data. We are grateful to the anonymous  
480 reviewers for valuable comments that helped improve our manuscript.

481

## 482 Figure Legend

483 **Figure 1. A.** The frequency of optimal codons (Fop) across all 16,434 genes studied in *T. castaneum*. Genes are  
484 categorized into low (lowest 5%, FPKM<0.013), moderate (5 to 95%) and high (top 5%) transcription (FPKM>103)  
485 groups based on average expression across all four tissue types (testes, ovaries, GT-males, GT-females). Different letters  
486 below bars indicate a statistically significant difference using Ranked ANOVA and Dunn's paired contrasts (P<0.05). **B.**  
487 The GC content of introns with respect to the expression level per gene (Spearman's Ranked R is shown). Values are  
488 shown for all genes with introns >50bp (N=5,143).

489

## 490 References

- 491 1. Duret, L. 2000, tRNA gene number and codon usage in the *C. elegans* genome are co-adapted for optimal  
492 translation of highly expressed genes. *Trends in Genetics*, **16**, 287-289.
- 493 2. Duret, L. and Mouchiroud, D. 1999, Expression pattern and, surprisingly, gene length shape codon usage in  
494 *Caenorhabditis*, *Drosophila*, and *Arabidopsis*. *Proceedings of the National Academy of Sciences of the United*  
495 *States of America*, **96**, 4482-4487.
- 496 3. Stoletzki, N. and Eyre-Walker, A. 2007, Synonymous codon usage in *Escherichia coli*: selection for  
497 translational accuracy. *Molecular biology and evolution*, **24**, 374-381.
- 498 4. Rocha, E. P. 2004, Codon usage bias from tRNA's point of view: redundancy, specialization, and efficient  
499 decoding for translation optimization. *Genome Res*, **14**, 2279-2286.
- 500 5. Akashi, H. 2001, Gene expression and molecular evolution. *Current Opinion in Genetics & Development*, **11**,  
501 660-666.
- 502 6. Ikemura, T. 1981, Correlation between the abundance of *Escherichia coli* transfer RNAs and the occurrence of  
503 the respective codons in its protein genes: a proposal for a synonymous codon choice that is optimal for the *E.*  
504 *coli* translational system. *J Mol Biol*, **151**, 389-409.

- 505 7. Yu, C. H., Dang, Y., Zhou, Z., et al. 2015, Codon Usage Influences the Local Rate of Translation Elongation to  
506 Regulate Co-translational Protein Folding. *Mol Cell*, **59**, 744-754.
- 507 8. Hershberg, R. and Petrov, D. A. 2008, Selection on codon bias. *Annu Rev Genet*, **42**, 287-299.
- 508 9. Zhao, F., Yu, C. H. and Liu, Y. 2017, Codon usage regulates protein structure and function by affecting  
509 translation elongation speed in *Drosophila* cells. *Nucleic Acids Res*, **45**, 8484-8492.
- 510 10. Sueoka, N. 1988, Directional mutation pressure and neutral molecular evolution. *Proceedings of the National  
511 Academy of Sciences of the United States of America*, **85**, 2653-2657.
- 512 11. Sharp, P. M., Averof, M., Lloyd, A. T., Matassi, G. and Peden, J. F. 1995, DNA sequence evolution: the sounds  
513 of silence. *Philosophical Transactions of the Royal Society of London. Series B: Biological Sciences*, **349**, 241-  
514 247.
- 515 12. Comeron, J. M. 2004, Selective and mutational patterns associated with gene expression in humans: influences  
516 on synonymous composition and intron presence. *Genetics*, **167**, 1293-1304.
- 517 13. Rao, Y., Wu, G., Wang, Z., Chai, X., Nie, Q. and Zhang, X. 2011, Mutation bias is the driving force of codon  
518 usage in the *Gallus gallus* genome. *DNA Res*, **18**, 499-512.
- 519 14. Ingvarsson, P. K. 2008, Molecular evolution of synonymous codon usage in *Populus*. *BMC Evolutionary  
520 Biology*, **8**, 307.
- 521 15. Cutter, A. D., Wasmuth, J. D. and Blaxter, M. L. 2006, The evolution of biased codon and amino acid usage in  
522 nematode genomes. *Molecular biology and evolution*, **23**, 2303-2315.
- 523 16. Whittle, C. A., Sun, Y. and Johannesson, H. 2011, Evolution of synonymous codon usage in *Neurospora  
524 tetrasperma* and *Neurospora discreta*. *Genome biology and Evolution*, **3**, 332-343.
- 525 17. Satapathy, S. S., Powdel, B. R., Buragohain, A. K. and Ray, S. K. 2016, Discrepancy among the synonymous  
526 codons with respect to their selection as optimal codon in bacteria. *DNA Res*.
- 527 18. Williford, A. and Demuth, J. P. 2012, Gene expression levels are correlated with synonymous codon usage,  
528 amino acid composition, and gene architecture in the red flour beetle, *Tribolium castaneum*. *Mol Biol Evol*, **29**,  
529 3755-3766.
- 530 19. Sharp, P. M., Tuohy, T. M. and Mosurski, K. R. 1986, Codon usage in yeast: cluster analysis clearly  
531 differentiates highly and lowly expressed genes. *Nucleic acids research*, **14**, 5125-5143.
- 532 20. Percudani, R., Pavesi, A. and Ottonello, S. 1997, Transfer RNA gene redundancy and translational selection in  
533 *Saccharomyces cerevisiae*. *J Mol Biol*, **268**, 322-330.
- 534 21. Qiu, S., Bergero, R., Zeng, K. and Charlesworth, D. 2011, Patterns of codon usage bias in *Silene latifolia*. *Mol  
535 Biol Evol*, **28**, 771-780.
- 536 22. Whittle, C. A. and Extavour, C. G. 2016, Expression-Linked Patterns of Codon Usage, Amino Acid Frequency,  
537 and Protein Length in the Basally Branching Arthropod *Parasteatoda tepidariorum*. *Genome Biol Evol*, **8**, 2722-  
538 2736.
- 539 23. Whittle, C. A. and Extavour, C. G. 2015, Codon and amino acid usage are shaped by selection across divergent  
540 model organisms of the Pancrustacea. *G3: Genes, Genomes, Genetics* **5**, 2307-2321.

- 541 24. Whittle, C. A. and Extavour, C. G. 2017, Rapid Evolution of Ovarian-Biased Genes in the Yellow Fever  
542 Mosquito (*Aedes aegypti*). *Genetics*, **206**, 2119-2137.
- 543 25. Behura, S. K. and Severson, D. W. 2011, Coadaptation of isoacceptor tRNA genes and codon usage bias for  
544 translation efficiency in *Aedes aegypti* and *Anopheles gambiae*. *Insect Mol Biol*, **20**, 177-187.
- 545 26. Stenico, M., Lloyd, A. T. and Sharp, P. M. 1994, Codon usage in *Caenorhabditis elegans*: delineation of  
546 translational selection and mutational biases. *Nucleic acids research*, **22**, 2437-2446.
- 547 27. Jia, X., Liu, S., Zheng, H., et al. 2015, Non-uniqueness of factors constraint on the codon usage in *Bombyx*  
548 *mori*. *BMC Genomics*, **16**, 356.
- 549 28. Du, M. Z., Wei, W., Qin, L., et al. 2017, Co-adaption of tRNA gene copy number and amino acid usage  
550 influences translation rates in three life domains. *DNA Res*, **24**, 623-633.
- 551 29. Ikemura, T. 1985, Codon usage and tRNA content in unicellular and multicellular organisms. *Molecular Biology*  
552 *and Evolution*, **2**, 13-34.
- 553 30. Cognat, V., Deragon, J. M., Vinogradova, E., Salinas, T., Remacle, C. and Marechal-Drouard, L. 2008, On the  
554 evolution and expression of *Chlamydomonas reinhardtii* nucleus-encoded transfer RNA genes. *Genetics*, **179**,  
555 113-123.
- 556 31. Moriyama, E. N. and Powell, J. R. 1997, Codon usage bias and tRNA abundance in *Drosophila*. *J Mol Evol*, **45**,  
557 514-523.
- 558 32. Behura, S. K. and Severson, D. W. 2011, Coadaptation of isoacceptor tRNA genes and codon usage bias for  
559 translation efficiency in *Aedes aegypti* and *Anopheles gambiae*. *Insect Molecular Biology*, **20**, 177-187.
- 560 33. Powell, J. R. and Moriyama, E. N. 1997, Evolution of codon usage bias in *Drosophila*. *Proc Natl Acad Sci U S*  
561 *A*, **94**, 7784-7790.
- 562 34. Stein, K. C. and Frydman, J. 2019, The stop-and-go traffic regulating protein biogenesis: How translation  
563 kinetics controls proteostasis. *J Biol Chem*, **294**, 2076-2084.
- 564 35. Tuller, T., Carmi, A., Vestsigian, K., et al. 2010, An evolutionarily conserved mechanism for controlling the  
565 efficiency of protein translation. *Cell*, **141**, 344-354.
- 566 36. Payne, B. L. and Alvarez-Ponce, D. 2019, Codon usage differences among genes expressed in different tissues  
567 of *Drosophila melanogaster*. *Genome Biol Evol*.
- 568 37. Dittmar, K. A., Goodenbour, J. M. and Pan, T. 2006, Tissue-specific differences in human transfer RNA  
569 expression. *PLoS Genet*, **2**, e221.
- 570 38. Camiolo, S., Farina, L. and Porceddu, A. 2012, The relation of codon bias to tissue-specific gene expression in  
571 *Arabidopsis thaliana*. *Genetics*, **192**, 641-649.
- 572 39. Quax, T., Claassens, N., Soll D and van der Oost, J. 2015, Codon Bias as a Means to Fine-Tune Gene  
573 Expression. *Molecular Cell*, **59**, 149-161.
- 574 40. Goodarzi, H., Nguyen, H. C. B., Zhang, S., Dill, B. D., Molina, H. and Tavazoie, S. F. 2016, Modulated  
575 Expression of Specific tRNAs Drives Gene Expression and Cancer Progression. *Cell*, **165**, 1416-1427.
- 576 41. Liu, Q. 2012, Mutational bias and translational selection shaping the codon usage pattern of tissue-specific genes  
577 in rice. *PLoS One*, **7**, e48295.

- 578 42. Novoa, E. M. and Ribas de Pouplana, L. 2012, Speeding with control: codon usage, tRNAs, and ribosomes.  
579 *Trends Genet*, **28**, 574-581.
- 580 43. Hanson, G. and Coller, J. 2018, Codon optimality, bias and usage in translation and mRNA decay. *Nat Rev Mol*  
581 *Cell Biol*, **19**, 20-30.
- 582 44. Torrent, M., Chalancon, G., de Groot, N. S., Wuster, A. and Madan Babu, M. 2018, Cells alter their tRNA  
583 abundance to selectively regulate protein synthesis during stress conditions. *Sci Signal*, **11**.
- 584 45. Xu, Y., Ma, P., Shah, P., Rokas, A., Liu, Y. and Johnson, C. H. 2013, Non-optimal codon usage is a mechanism  
585 to achieve circadian clock conditionality. *Nature*, **495**, 116-120.
- 586 46. Pechmann, S. and Frydman, J. 2013, Evolutionary conservation of codon optimality reveals hidden signatures of  
587 cotranslational folding. *Nat Struct Mol Biol*, **20**, 237-243.
- 588 47. Gingold, H., Dahan, O. and Pilpel, Y. 2012, Dynamic changes in translational efficiency are deduced from  
589 codon usage of the transcriptome. *Nucleic Acids Res*, **40**, 10053-10063.
- 590 48. Presnyak, V., Alhusaini, N., Chen, Y. H., et al. 2015, Codon optimality is a major determinant of mRNA  
591 stability. *Cell*, **160**, 1111-1124.
- 592 49. Frenkel-Morgenstern, M., Danon, T., Christian, T., et al. 2012, Genes adopt non-optimal codon usage to  
593 generate cell cycle-dependent oscillations in protein levels. *Mol Syst Biol*, **8**, 572.
- 594 50. Stadler, M. and Fire, A. 2011, Wobble base-pairing slows in vivo translation elongation in metazoans. *RNA*, **17**,  
595 2063-2073.
- 596 51. Letzring, D. P., Dean, K. M. and Grayhack, E. J. 2010, Control of translation efficiency in yeast by codon-  
597 anticodon interactions. *RNA*, **16**, 2516-2528.
- 598 52. Wang, L., Wang, S., Li, Y., Paradesi, M. S. and Brown, S. J. 2007, BeetleBase: the model organism database for  
599 *Tribolium castaneum*. *Nucleic Acids Res*, **35**, D476-479.
- 600 53. Tribolium Genome Sequencing, C., Richards, S., Gibbs, R. A., et al. 2008, The genome of the model beetle and  
601 pest *Tribolium castaneum*. *Nature*, **452**, 949-955.
- 602 54. Brown, S. J., Shippy, T. D., Miller, S., et al. 2009, The red flour beetle, *Tribolium castaneum* (Coleoptera): a  
603 model for studies of development and pest biology. *Cold Spring Harb Protoc*, **2009**, pdb emo126.
- 604 55. Savard, J., Marques-Souza, H., Aranda, M. and Tautz, D. 2006, A segmentation gene in tribolium produces a  
605 polycistronic mRNA that codes for multiple conserved peptides. *Cell*, **126**, 559-569.
- 606 56. Denell, R. 2008, Establishment of tribolium as a genetic model system and its early contributions to evo-devo.  
607 *Genetics*, **180**, 1779-1786.
- 608 57. Choe, C. P., Stellabotte, F. and Brown, S. J. 2017, Regulation and function of odd-paired in *Tribolium*  
609 segmentation. *Dev Genes Evol*, **227**, 309-317.
- 610 58. Brown, S. J., Hilgenfeld, R. B. and Denell, R. E. 1994, The beetle *Tribolium castaneum* has a fushi tarazu  
611 homolog expressed in stripes during segmentation. *Proc Natl Acad Sci U S A*, **91**, 12922-12926.
- 612 59. Wang, B., Shao, Z. Q., Xu, Y., et al. 2011, Optimal codon identities in bacteria: implications from the  
613 conflicting results of two different methods. *PLoS One*, **6**, e22714.

- 614 60. Whittle, C. A., Kulkarni, A. and Extavour, C. G. 2019, Absence of a faster-X effect in beetles (*Tribolium*,  
615 Coleoptera). *BioRxiv*; <https://doi.org/10.1101/754903>
- 616 61. Kearse, M., Moir, R., Wilson, A., et al. 2012, Geneious Basic: an integrated and extendable desktop software  
617 platform for the organization and analysis of sequence data. *Bioinformatics*, **28**, 1647-1649.
- 618 62. Puigbo, P., Bravo, I. G. and Garcia-Vallve, S. 2008, CAIcal: a combined set of tools to assess codon usage  
619 adaptation. *Biol Direct*, **3**, 38.
- 620 63. Whittle, C. A., Malik, M. R. and Krochko, J. E. 2007, Gender-specific selection on codon usage in plant  
621 genomes. *BMC Genomics*, **8**, 169-179.
- 622 64. Peden, J. F. 1999, Analysis of codon usage. University of Nottingham.
- 623 65. Mugal, C. F., von Grunberg, H. H. and Peifer, M. 2009, Transcription-induced mutational strand bias and its  
624 effect on substitution rates in human genes. *Mol Biol Evol*, **26**, 131-142.
- 625 66. Beletskii, A. and Bhagwat, A. S. 1996, Transcription-induced mutations: increase in C to T mutations in the  
626 nontranscribed strand during transcription in *Escherichia coli*. *Proc Natl Acad Sci U S A*, **93**, 13919-13924.
- 627 67. Guo, X., Bao, J. and Fan, L. 2007, Evidence of selectively driven codon usage in rice: implications for GC  
628 content evolution of Gramineae genes. *FEBS Lett*, **581**, 1015-1021.
- 629 68. Lowe, T. M. and Chan, P. P. 2016, tRNAscan-SE On-line: integrating search and context for analysis of transfer  
630 RNA genes. *Nucleic Acids Res*, **44**, W54-57.
- 631 69. Mi, H., Muruganujan, A. and Thomas, P. D. 2013, PANTHER in 2013: modeling the evolution of gene function,  
632 and other gene attributes, in the context of phylogenetic trees. *Nucleic Acids Res*, **41**, D377-386.
- 633 70. Coghlan, A. and Wolfe, K. H. 2000, Relationship of codon bias to mRNA concentration and protein length in  
634 *Saccharomyces cerevisiae*. *Yeast*, **16**, 1131-1145.
- 635 71. Polak, P., Querfurth, R. and Arndt, P. F. 2010, The evolution of transcription-associated biases of mutations  
636 across vertebrates. *BMC Evol Biol*, **10**, 187.
- 637 72. Schober, P., Boer, C. and Schwarte, L. A. 2018, Correlation Coefficients: Appropriate Use and Interpretation.  
638 *Anesthesia & Analgesia*, **126**, 1763-1768.
- 639 73. Akoglu, H. 2018, User's guide to correlation coefficients. *Turk J Emerg Med*, **18**, 91-93.
- 640 74. Sharp, P. M., Bailes, E., Grocock, R. J., Peden, J. F. and Sockett, R. E. 2005, Variation in the strength of  
641 selected codon usage bias among bacteria. *Nucleic Acids Res*, **33**, 1141-1153.
- 642 75. Semon, M., Lobry, J. R. and Duret, L. 2006, No evidence for tissue-specific adaptation of synonymous codon  
643 usage in humans. *Mol Biol Evol*, **23**, 523-529.
- 644 76. Plotkin, J. B., Robins, H. and Levine, A. J. 2004, Tissue-specific codon usage and the expression of human  
645 genes. *Proc Natl Acad Sci U S A*, **101**, 12588-12591.
- 646 77. Pang, Y. L., Abo, R., Levine, S. S. and Dedon, P. C. 2014, Diverse cell stresses induce unique patterns of tRNA  
647 up- and down-regulation: tRNA-seq for quantifying changes in tRNA copy number. *Nucleic Acids Res*, **42**,  
648 e170.



- 649 78. Smith, A. M., Abu-Shumays, R., Akeson, M. and Bernick, D. L. 2015, Capture, Unfolding, and Detection of  
650 Individual tRNA Molecules Using a Nanopore Device. *Front Bioeng Biotechnol*, **3**, 91.
- 651 79. Sorensen, M. A. 2001, Charging levels of four tRNA species in Escherichia coli Rel(+) and Rel(-) strains during  
652 amino acid starvation: a simple model for the effect of ppGpp on translational accuracy. *J Mol Biol*, **307**, 785-  
653 798.
- 654 80. Zalucki, Y. M. and Jennings, M. P. 2007, Experimental confirmation of a key role for non-optimal codons in  
655 protein export. *Biochem Biophys Res Commun*, **355**, 143-148.
- 656 81. Torres, A. G., Pineyro, D., Filonava, L., Stracker, T. H., Batlle, E. and Ribas de Pouplana, L. 2014, A-to-I  
657 editing on tRNAs: biochemical, biological and evolutionary implications. *FEBS Lett*, **588**, 4279-4286.
- 658 82. Novoa, E. M., Pavon-Eternod, M., Pan, T. and Ribas de Pouplana, L. 2012, A role for tRNA modifications in  
659 genome structure and codon usage. *Cell*, **149**, 202-213.
- 660 83. Keegan, L. P., Gerber, A. P., Brindle, J., et al. 2000, The properties of a tRNA-specific adenosine deaminase  
661 from *Drosophila melanogaster* support an evolutionary link between pre-mRNA editing and tRNA modification.  
662 *Mol Cell Biol*, **20**, 825-833.
- 663 84. Tuorto, F. and Lyko, F. 2016, Genome recoding by tRNA modifications. *Open Biol*, **6**.
- 664 85. Subramanian, S. 2008, Nearly neutrality and the evolution of codon usage bias in eukaryotic genomes. *Genetics*,  
665 **178**, 2429-2432.
- 666 86. Akashi, H. 1997, Codon bias evolution in *Drosophila*. Population genetics of mutation-selection drift. *Gene*,  
667 **205**, 269-278.
- 668 87. dos Reis, M., Savva, R. and Wernisch, L. 2004, Solving the riddle of codon usage preferences: a test for  
669 translational selection. *Nucleic Acids Res*, **32**, 5036-5044.
- 670 88. Sharp, P. M., Emery, L. R. and Zeng, K. 2010, Forces that influence the evolution of codon bias. *Philos Trans R*  
671 *Soc Lond B Biol Sci*, **365**, 1203-1212.
- 672 89. Bennett, M. D., Leitch, I. J., Price, H. J. and Johnston, J. S. 2003, Comparisons with *Caenorhabditis*  
673 (approximately 100 Mb) and *Drosophila* (approximately 175 Mb) using flow cytometry show genome size in  
674 *Arabidopsis* to be approximately 157 Mb and thus approximately 25% larger than the *Arabidopsis* genome  
675 initiative estimate of approximately 125 Mb. *Ann Bot*, **91**, 547-557.
- 676 90. Pechmann, S., Chartron, J. W. and Frydman, J. 2014, Local slowdown of translation by nonoptimal codons  
677 promotes nascent-chain recognition by SRP in vivo. *Nat Struct Mol Biol*, **21**, 1100-1105.
- 678 91. Zhou, M., Wang, T., Fu, J., Xiao, G. and Liu, Y. 2015, Nonoptimal codon usage influences protein structure in  
679 intrinsically disordered regions. *Mol Microbiol*, **97**, 974-987.
- 680 92. Jacobson, G. N. and Clark, P. L. 2016, Quality over quantity: optimizing co-translational protein folding with  
681 non-'optimal' synonymous codons. *Curr Opin Struct Biol*, **38**, 102-110.
- 682 93. Whittle, C. A., Sun, Y. and Johannesson, H. 2012, Genome-wide selection on codon usage at the population  
683 level in the fungal model organism *Neurospora crassa*. *Mol Biol Evol*, **29**, 1975-1986.
- 684 94. Percudani, R. 2001, Restricted wobble rules for eukaryotic genomes. *Trends Genet*, **17**, 133-135.

685

**Table 1.** The organism-wide  $\Delta$ RSCU between high versus low expressed genes (using averaged expression across all four tissue types, the ovaries, testes, GT-females, and GT-males). In addition, the  $\Delta$ RSCU are shown when high and low expressed genes were determined for each of the four individual tissue types. The primary optimal (Opt.) codons are in bold and have the largest positive and statistically significant  $\Delta$ RSCU (t-test  $P < 0.05$ ) per amino acid. For the combined four tissue assessment (organism-wide), the primary optimal (Opt.) and non-optimal codons (Non opt.) are shown with X. Cases where relatively plentiful tRNA genes match the optimal codon per amino acid are underlined and bold. The wobble anticodons for codons with zero matching tRNA copies are shown (standard anticodon/wobble anticodon shown according to classical wobble rules; see also<sup>81,94</sup>).

| Amino Acid | Codon | Organism-wide RSCU & $\Delta$ RSCU<br>(from average expression across all tissues) |          |               |    |          |                      |                  |                      | $\Delta$ RSCU per Tissue Type<br>(from expression within each tissue) |                |                      |                |                      |    |                    |                |
|------------|-------|------------------------------------------------------------------------------------|----------|---------------|----|----------|----------------------|------------------|----------------------|-----------------------------------------------------------------------|----------------|----------------------|----------------|----------------------|----|--------------------|----------------|
|            |       | High RSCU                                                                          | Low RSCU | $\Delta$ RSCU | P  | Opt.     | Non opt.             | tRNA No.         | Standard/Wobble      | $\Delta$ RSCU ovaries                                                 | P              | $\Delta$ RSCU testes | P              | $\Delta$ RSCU female | P  | $\Delta$ RSCU male | P              |
| Ala        | GCT   | 1.144                                                                              | 1.001    | <b>+0.143</b> | ** | <b>X</b> |                      | <b><u>14</u></b> |                      | +0.109                                                                |                | <b>+0.136</b>        | *              | <b>+0.179</b>        | ** | +0.146             | **             |
| Ala        | GCC   | 1.238                                                                              | 1.203    | +0.034        |    |          |                      | 0                | GGC/AGC              | +0.023                                                                |                | +0.020               |                | +0.115               | *  | <b>+0.198</b>      | **             |
| Ala        | GCA   | 0.833                                                                              | 0.867    | -0.033        |    |          |                      | 2                |                      | -0.065                                                                | * <sup>a</sup> | -0.008               |                | -0.110               | *  | -0.175             | **             |
| Ala        | GCG   | 0.731                                                                              | 0.899    | -0.168        | ** |          | <b>X</b>             | 3                |                      | -0.047                                                                |                | -0.128               | **             | -0.163               | ** | -0.161             | **             |
| Arg        | CGT   | 0.919                                                                              | 0.830    | +0.089        | *  |          |                      | 5                |                      | +0.082                                                                |                | +0.087               | *              | -0.043               |    | +0.116             | *              |
| Arg        | CGC   | 0.907                                                                              | 1.117    | -0.209        | ** |          |                      | 0                | GCG/ACG              | -0.204                                                                | *              | -0.112               | **             | -0.231               | ** | -0.091             | *              |
| Arg        | CGA   | 0.946                                                                              | 1.212    | -0.265        | ** |          | <b>X<sup>b</sup></b> | 4                |                      | -0.304                                                                | **             | -0.143               | **             | -0.189               | ** | -0.282             | **             |
| Arg        | CGG   | 0.650                                                                              | 0.941    | -0.290        | ** |          | <b>X</b>             | 0                | CCG/UCG              | -0.235                                                                | **             | -0.263               | **             | -0.195               | ** | -0.272             | **             |
| Arg        | AGA   | 1.401                                                                              | 0.990    | <b>+0.411</b> | ** | <b>X</b> |                      | <b><u>3</u></b>  |                      | <b>+0.393</b>                                                         | **             | <b>+0.341</b>        | **             | <b>+0.415</b>        | ** | <b>+0.276</b>      | **             |
| Arg        | AGG   | 1.096                                                                              | 0.801    | +0.295        | ** |          |                      | 3                |                      | +0.367                                                                | **             | +0.247               | **             | +0.250               | ** | +0.287             | **             |
| Asn        | AAT   | 1.030                                                                              | 0.997    | +0.033        |    |          |                      | 0                | AUU/GUU              | +0.039                                                                |                | +0.041               | * <sup>a</sup> | +0.012               |    | -0.027             |                |
| Asn        | AAC   | 0.955                                                                              | 0.864    | <b>+0.091</b> | ** | <b>X</b> |                      | <b><u>5</u></b>  |                      | <b>+0.071</b>                                                         | *              | <b>+0.067</b>        | *              | <b>+0.066</b>        | *  | <b>+0.115</b>      | **             |
| Asp        | GAT   | 1.002                                                                              | 0.938    | <b>+0.063</b> | *  | <b>X</b> |                      | 0                | AUC/GUC <sup>e</sup> | <b>+0.115</b>                                                         | **             | <b>+0.084</b>        | **             | <b>+0.070</b>        | *  | +0.031             |                |
| Asp        | GAC   | 0.942                                                                              | 0.964    | -0.021        |    |          | <b>X<sup>c</sup></b> | 10               |                      | -0.035                                                                | * <sup>a</sup> | -0.008               |                | -0.026               |    | +0.000             |                |
| Cys        | TGT   | 0.986                                                                              | 0.854    | <b>+0.131</b> | ** | <b>X</b> |                      | 0                | ACA/GCA <sup>e</sup> | <b>+0.204</b>                                                         | **             | <b>+0.130</b>        | **             | <b>+0.155</b>        | ** | <b>+0.103</b>      | **             |
| Cys        | TGC   | 0.802                                                                              | 0.827    | -0.025        |    |          |                      | 3                |                      | -0.026                                                                |                | +0.028               |                | -0.029               | *  | -0.006             |                |
| Gln        | CAA   | 1.179                                                                              | 1.098    | <b>+0.081</b> | *  | <b>X</b> |                      | <b><u>5</u></b>  |                      | +0.043                                                                |                | <b>+0.089</b>        | *              | <b>+0.099</b>        | *  | <b>+0.064</b>      | * <sup>a</sup> |

|     |     |       |       |               |                |                      |                      |                      |                      |               |                |               |                |               |               |                |                |
|-----|-----|-------|-------|---------------|----------------|----------------------|----------------------|----------------------|----------------------|---------------|----------------|---------------|----------------|---------------|---------------|----------------|----------------|
| Gln | CAG | 0.758 | 0.785 | -0.026        |                |                      | 3                    |                      | +0.026               | +0.002        | -0.053         | -0.015        |                |               |               |                |                |
| Glu | GAA | 1.236 | 1.110 | <b>+0.125</b> | **             | <b>X</b>             | <u>8</u>             |                      | <b>+0.093</b>        | *             | <b>+0.101</b>  | **            | <b>+0.100</b>  | *             | <b>+0.086</b> | *              |                |
| Glu | GAG | 0.733 | 0.767 | -0.034        |                |                      | 5                    |                      | -0.006               | +0.002        | -0.036         | -0.024        |                |               |               |                |                |
| Gly | GGT | 0.918 | 0.801 | <b>+0.116</b> | **             | <b>X</b>             | 0                    | ACC/GCC <sup>e</sup> | +0.138               | *             | <b>+0.133</b>  | **            | +0.046         |               | <b>+0.063</b> | *              |                |
| Gly | GGC | 1.017 | 1.122 | -0.104        | *              |                      | <b>X</b>             | 8                    |                      | -0.109        | -0.077         | *             | -0.070         |               | -0.001        |                |                |
| Gly | GGA | 1.124 | 1.201 | -0.077        | * <sup>a</sup> |                      | <b>X<sup>b</sup></b> | 15                   |                      | -0.137        | **             | -0.071        | **             | -0.017        | *             | -0.070         | **             |
| Gly | GGG | 0.859 | 0.792 | +0.066        |                |                      |                      | 1                    |                      | <b>+0.171</b> | **             | +0.072        | *              | <b>+0.059</b> | *             | +0.043         |                |
| His | CAT | 0.840 | 0.817 | +0.023        |                |                      |                      | 0                    | AUG/GUG              | +0.055        |                | +0.032        |                | +0.016        |               | -0.017         |                |
| His | CAC | 1.014 | 0.978 | +0.036        |                |                      |                      | 7                    |                      | <b>+0.067</b> | * <sup>a</sup> | +0.054        |                | <b>+0.053</b> | *             | <b>+0.084</b>  | *              |
| Ile | ATT | 1.359 | 1.278 | <b>+0.081</b> | *              | <b>X<sup>d</sup></b> | <u>7</u>             |                      | <b>+0.121</b>        | **            | <b>+0.051</b>  | *             | <b>+0.115</b>  | *             | +0.033        | * <sup>a</sup> |                |
| Ile | ATC | 1.024 | 0.941 | <b>+0.083</b> | *              | <b>X<sup>d</sup></b> |                      | 0                    | GAU/AAU              | +0.005        |                | +0.078        |                | +0.012        |               | <b>+0.165</b>  | **             |
| Ile | ATA | 0.578 | 0.661 | -0.083        | *              |                      | <b>X</b>             | 2                    |                      | -0.048        |                | -0.057        |                | -0.071        |               | -0.141         | **             |
| Leu | TTA | 0.999 | 1.127 | -0.128        | *              |                      | <b>X</b>             | 2                    |                      | -0.087        | *              | -0.095        | *              | -0.121        | *             | -0.211         | **             |
| Leu | TTG | 1.794 | 1.336 | <b>+0.458</b> | **             | <b>X</b>             | <u>4</u>             |                      | <b>+0.409</b>        | **            | <b>+0.391</b>  | **            | <b>+0.339</b>  | **            | <b>+0.444</b> | **             |                |
| Leu | CTT | 0.901 | 0.998 | -0.096        | *              |                      |                      | 5                    |                      | -0.139        | **             | -0.082        | *              | -0.003        |               | -0.053         | * <sup>a</sup> |
| Leu | CTC | 0.877 | 0.926 | -0.049        |                |                      |                      | 0                    | GAG/AAG              | -0.081        |                | -0.033        |                | -0.042        |               | +0.036         |                |
| Leu | CTA | 0.492 | 0.561 | -0.068        | *              |                      |                      | 2                    |                      | +0.023        |                | -0.075        | * <sup>a</sup> | -0.003        |               | -0.073         | *              |
| Leu | CTG | 0.900 | 1.008 | -0.107        | *              |                      |                      | 2                    |                      | -0.093        |                | -0.092        | *              | -0.158        | **            | -0.108         | *              |
| Lys | AAA | 1.272 | 1.273 | -0.000        |                |                      |                      | 6                    |                      | -0.019        |                | -0.005        |                | <b>+0.068</b> | *             | -0.011         |                |
| Lys | AAG | 0.728 | 0.654 | <b>+0.074</b> | *              | <b>X</b>             | <u>5</u>             |                      | <b>+0.075</b>        | *             | <b>+0.067</b>  | *             | -0.020         |               | <b>+0.058</b> | *              |                |
| Phe | TTT | 1.058 | 1.042 | +0.015        |                |                      |                      | 1                    |                      | +0.073        |                | +0.003        |                | +0.016        |               | -0.092         | **             |
| Phe | TTC | 0.916 | 0.850 | <b>+0.065</b> | *              | <b>X</b>             | <u>5</u>             |                      | +0.015               |               | <b>+0.076</b>  | *             | +0.034         |               | <b>+0.160</b> | **             |                |
| Pro | CCT | 0.904 | 0.785 | +0.119        | *              |                      |                      | 7                    |                      | <b>+0.126</b> | *              | +0.092        | *              | +0.097        | *             | +0.076         | *              |
| Pro | CCC | 1.090 | 0.917 | <b>+0.172</b> | **             | <b>X</b>             |                      | 0                    | GGG/AGG <sup>e</sup> | +0.064        | *              | <b>+0.131</b> | *              | <b>+0.163</b> | *             | <b>+0.264</b>  | **             |
| Pro | CCA | 1.044 | 1.014 | +0.029        |                |                      | <b>X<sup>c</sup></b> | 13                   |                      | +0.166        |                | +0.021        |                | +0.063        |               | -0.021         |                |
| Pro | CCG | 0.889 | 1.102 | -0.213        | **             |                      | <b>X</b>             | 1                    |                      | -0.220        | **             | -0.140        | **             | -0.249        | **            | -0.237         | **             |
| Ser | TCT | 0.849 | 0.732 | +0.116        | *              |                      |                      | 4                    |                      | +0.084        |                | +0.073        |                | +0.061        |               | +0.026         |                |
| Ser | TCC | 0.894 | 1.056 | -0.162        | **             |                      |                      | 0                    | GGA/AGA              | -0.137        |                | -0.152        | **             | -0.051        |               | -0.010         |                |
| Ser | TCA | 1.059 | 0.977 | +0.082        | * <sup>a</sup> |                      |                      | 2                    |                      | +0.114        |                | +0.072        | *              | -0.017        |               | +0.001         |                |
| Ser | TCG | 1.128 | 1.231 | -0.103        | *              |                      |                      | 2                    |                      | -0.066        |                | -0.023        |                | -0.101        | *             | -0.012         |                |

|     |     |       |       |               |    |          |          |           |                      |               |    |               |                |               |    |               |    |
|-----|-----|-------|-------|---------------|----|----------|----------|-----------|----------------------|---------------|----|---------------|----------------|---------------|----|---------------|----|
| Ser | AGT | 1.149 | 0.922 | <b>+0.226</b> | ** | <b>X</b> |          | 0         | ACU/GCU <sup>e</sup> | <b>+0.218</b> | ** | <b>+0.197</b> | **             | <b>+0.268</b> | ** | <b>+0.137</b> | ** |
| Ser | AGC | 0.900 | 1.039 | -0.138        | *  |          | <b>X</b> | 3         |                      | -0.156        | *  | -0.156        | **             | -0.125        | ** | -0.105        | ** |
| Thr | ACT | 1.107 | 0.884 | <b>+0.222</b> | ** | <b>X</b> |          | <u>5</u>  |                      | <b>+0.199</b> | ** | <b>+0.266</b> | **             | <b>+0.188</b> | ** | <b>+0.207</b> | ** |
| Thr | ACC | 1.032 | 1.003 | +0.029        |    |          |          | 0         | GGU/AGU              | +0.026        |    | -0.026        | * <sup>a</sup> | +0.148        | *  | +0.178        | ** |
| Thr | ACA | 1.001 | 1.013 | -0.012        |    |          |          | 3         |                      | -0.027        |    | -0.059        |                | -0.076        |    | -0.136        | ** |
| Thr | ACG | 0.812 | 1.006 | -0.194        | ** |          | <b>X</b> | 2         |                      | -0.129        | *  | -0.113        | *              | -0.213        | ** | -0.211        | ** |
| Tyr | TAT | 0.819 | 0.881 | -0.062        | *  |          |          | 0         | AUA/GUA              | +0.040        |    | -0.018        | *              | -0.041        | *  | -0.080        | ** |
| Tyr | TAC | 1.096 | 0.898 | <b>+0.197</b> | ** | <b>X</b> |          | <u>13</u> |                      | <b>+0.123</b> | *  | <b>+0.162</b> | **             | <b>+0.156</b> | ** | <b>+0.210</b> | ** |
| Val | GTT | 1.262 | 1.133 | <b>+0.129</b> | *  | <b>X</b> |          | <u>7</u>  |                      | <b>+0.124</b> | *  | <b>+0.119</b> | *              | <b>+0.157</b> | *  | <b>+0.101</b> | *  |
| Val | GTC | 0.976 | 0.999 | -0.022        |    |          |          | 0         | GAC/AAC              | -0.017        |    | -0.034        | * <sup>a</sup> | -0.027        |    | +0.053        |    |
| Val | GTA | 0.552 | 0.625 | -0.073        | *  |          | <b>X</b> | 5         |                      | -0.047        | *  | -0.064        | *              | -0.019        |    | -0.082        | *  |
| Val | GTG | 1.156 | 1.140 | +0.015        |    |          |          | 3         |                      | +0.020        |    | +0.032        |                | -0.055        |    | -0.041        |    |

\*\*P<0.001, \*P<0.05 and ≥0.001; <sup>a</sup>P-values are between 0.05 and 0.1 and thus is considered a putative optimal or non-optimal codon; <sup>b</sup>Secondary non-optimal codon with relatively high matching tRNA count; <sup>c</sup> While not having a statistically significant negative ΔRSCU, the codon is not optimal and is notable by its high tRNA count; <sup>d</sup> Both codons are optimal codons at nearly the same level; <sup>e</sup> Codon has Opt-codon<sub>wobble</sub> status.

**Table 2.** Examples of functions of the highly transcribed genes in *T. castaneum* that have elevated use of codons with Nonopt-codon<sub>↑tRNAs</sub> status (non-optimal codons with abundant matching tRNA genes ( $\geq 4$ )). While these codons are by definition typically uncommon in highly transcribed genes (Table 1), the subset of genes with elevated use of these codons, RSCU >1.5, were identified and are shown below. These genes are candidates for translational upregulation due to the elevated use of codons with Nonopt-codon<sub>↑tRNAs</sub> status.

| <b>High GGC Usage for Gly (with RSCU&gt;1.5)</b> |                                                          |
|--------------------------------------------------|----------------------------------------------------------|
| <b>Gene Functions</b>                            |                                                          |
| <u>Ribosomal protein genes</u>                   |                                                          |
| TC006109                                         | 14-3-3 protein epsilon-like Protein                      |
| TC011123                                         | 40S ribosomal protein S13-like Protein                   |
| TC008667                                         | 40S ribosomal protein S20-like Protein                   |
| TC005984                                         | 40S ribosomal protein S26                                |
| TC010830                                         | 40S ribosomal protein S6                                 |
| TC009214                                         | 40S ribosomal protein S7                                 |
| TC014757                                         | 40S ribosomal protein S8                                 |
| TC016306                                         | 60S acidic ribosomal protein P0                          |
| TC010413                                         | 60S acidic ribosomal protein P1-like Protein             |
| TC015013                                         | 60S acidic ribosomal protein P2-like Protein             |
| TC013536                                         | 60S ribosomal protein L17-like Protein                   |
| TC007932                                         | 60S ribosomal protein L21-like Protein                   |
| TC013168                                         | 60S ribosomal protein L4-like Protein                    |
| TC030666                                         | 60S ribosomal protein L6-like Protein                    |
| TC011182                                         | 60S ribosomal protein L7a-like Protein                   |
| <u>Olfactory</u>                                 |                                                          |
| TC007741                                         | Odorant binding protein 12                               |
| TC010070                                         | Odorant binding protein C06                              |
| TC008681                                         | Chemosensory protein 1                                   |
| <u>Stress-response</u>                           |                                                          |
| TC004948                                         | Peroxiredoxin 1-like Protein                             |
| TC014929                                         | Peroxiredoxin 1-like Protein                             |
| <u>Uncharacterized Proteins (N=50)</u>           |                                                          |
| <b>High GTA usage for Val (with RSCU&gt;1.5)</b> |                                                          |
| <u>Cytoskeletal</u>                              |                                                          |
| TC001574                                         | Cofilin/actin-depolymerizing factor homolog-like Protein |
| TC033072                                         | profilin                                                 |
| <u>p53 related</u>                               |                                                          |
| TC034594                                         | Cell death-inducing p53-target protein 1-like protein    |
| <u>Ribosomal protein genes (N=0)</u>             |                                                          |
| <u>Uncharacterized Proteins (N=15)</u>           |                                                          |
| <b>High CGA usage for Arg (with RSCU&gt;1.5)</b> |                                                          |
| <u>Olfactory</u>                                 |                                                          |
| TC010070                                         | Odorant binding protein C06; TcOBP7M ortholog            |
| TC030421                                         | Odorant receptor 305; Or305; ortholog                    |
| TC008681                                         | Chemosensory protein 1; TcCSP7K; ortholog                |
| <u>p53 related</u>                               |                                                          |
| TC034594                                         | Cell death-inducing p53-target protein 1-like protein    |
| <u>Cytoskeletal</u>                              |                                                          |
| TC007700                                         | Tubulin-specific chaperone cofactor E-like protein       |
| TC009721                                         | Microtubule-protein RP/EB family member 1                |



---

|          |                                                     |
|----------|-----------------------------------------------------|
| TC012270 | Troponin C, isoform 1-like Protein                  |
| TC033072 | Profilin                                            |
| TC001942 | Putative dynactin subunit 2-like Protein (Fragment) |

---

*Ribosomal protein genes (N=0)*

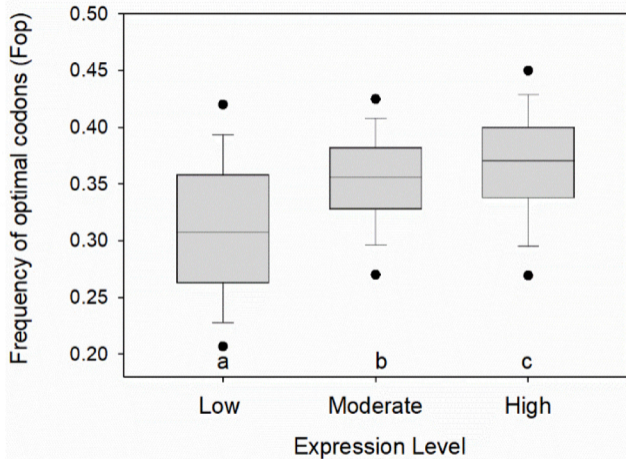

A

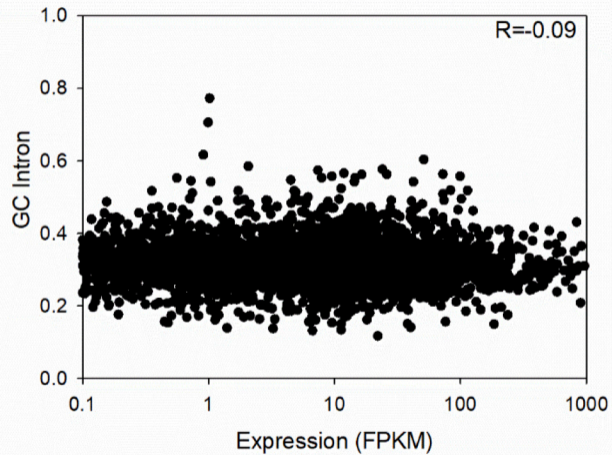

B

## **SUPPLEMENTARY MATERIAL**

### **Evidence of multifaceted functions of codon usage in translation within the model beetle *Tribolium castaneum***

Carrie A. Whittle, Arpita Kulkarni, Cassandra G. Extavour

**Table S1.** The number of RNA-seq reads for each tissue-type in the present study <sup>1</sup>. RNA-seq data are shown before and after adapter and quality trimming with BBDuk (<https://jgi.doe.gov/data-and-tools/bbtools/>). The Short Read Archive (SRA) Biosample identifiers are also shown (<https://www.ncbi.nlm.nih.gov/sra>).

| Tissue Sample <sup>a</sup> | No. of Reads    |                | SRA Biosample ID |
|----------------------------|-----------------|----------------|------------------|
|                            | Before trimming | After trimming |                  |
| <i>Tribolium castaneum</i> |                 |                |                  |
| Testes sample 1            | 18,006,255      | 17,995,655     | SAMN12702873     |
| Ovary sample 1             | 39,140,493      | 39,122,050     | SAMN12702874     |
| GT-male sample 1           | 25,630,261      | 25,609,723     | SAMN12702875     |
| GT-female sample 1         | 41,513,717      | 41,472,348     | SAMN12702876     |
| Testes sample 2            | 24,795,583      | 24,787,238     | SAMN12702877     |
| Ovary sample 2             | 22,306,622      | 22,286,961     | SAMN12702878     |
| GT-male sample 2           | 62,781,001      | 62,712,242     | SAMN12702879     |
| GT-female 2                | 52,275,340      | 52,211,149     | SAMN12702880     |

<sup>a</sup> Reads were obtained from for two RNA-seq runs of each biological sample.

**Table S2.** Comparison of the primary optimal codon list generated using the organism-wide analyses of high and low expressed genes in the present study ( $\Delta$ RSCU) to optimal codons obtained using the correlation method in Williford and Demuth (2012), which defined up to three optimal codons per amino acid. Cases wherein the present primary optimal codon matched an optimal codon (at any level) identified under the correlation approach are indicated in the right-most column. Optimal codons defined in each study are in bold and underlined.

| $\Delta$ RSCU Method Herein |                      |                    | Correlation Method <sup>2</sup> |                   |           |         | Same optimal codon       |                      |
|-----------------------------|----------------------|--------------------|---------------------------------|-------------------|-----------|---------|--------------------------|----------------------|
| Amino Acid                  | Codon                | RSCU (All Tissues) | Amino Acid                      | Codon             | Female RT | Male RT | Female & Male whole body |                      |
| Ala                         | <b><u>GCT</u></b>    | <b>+0.143</b>      | Ala                             | GCT               | -0.028    | -0.014  | 0.005                    | NO*                  |
| Ala                         | GCC                  | +0.034             | Ala                             | <b><u>GCC</u></b> | 0.176     | 0.16    | 0.184                    |                      |
| Ala                         | GCA                  | -0.033             | Ala                             | GCA               | -0.17     | -0.15   | -0.155                   |                      |
| Ala                         | GCG                  | -0.168             | Ala                             | <b><u>GCG</u></b> | 0.078     | 0.061   | 0.017                    |                      |
| Arg                         | CGT                  | +0.089             | Arg                             | CGT               | 0.016     | 0.008   | 0.0002                   |                      |
| Arg                         | CGC                  | -0.209             | Arg                             | <b><u>CGC</u></b> | 0.068     | 0.075   | 0.052                    |                      |
| Arg                         | CGA                  | -0.265             | Arg                             | CGA               | -0.15     | -0.154  | -0.13                    |                      |
| Arg                         | CGG                  | -0.290             | Arg                             | CGG               | -0.012    | -0.029  | -0.038                   |                      |
| Arg                         | <b><u>AGA</u></b>    | <b>+0.411</b>      | Arg                             | AGA               | -0.006    | 0.012   | 0.031                    | NO                   |
| Arg                         | AGG                  | +0.295             | Arg                             | <b><u>AGG</u></b> | 0.23      | 0.225   | 0.209                    |                      |
| Asn                         | AAT                  | +0.033             | Asn                             | AAT               | -0.112    | -0.1    | -0.135                   |                      |
| Asn                         | <b><u>AAC</u></b>    | <b>+0.091</b>      | Asn                             | <b><u>AAC</u></b> |           |         |                          | <b><u>YES</u></b>    |
| Asp                         | <b><u>GAT</u></b>    | <b>+0.063</b>      | Asp                             | GAT               | -0.028    | -0.023  | -0.043                   | NO                   |
| Asp                         | GAC                  | -0.021             | Asp                             | GAC               |           |         |                          |                      |
| Cys                         | <b><u>TGT</u></b>    | <b>+0.131</b>      | Cys                             | TGT               | -0.014    | 0.009   | -0.011                   | NO                   |
| Cys                         | TGC                  | -0.025             | Cys                             | TGC               |           |         |                          |                      |
| Gln                         | <b><u>CAA</u></b>    | <b>+0.081</b>      | Gln                             | CAA               | -0.101    | -0.075  | -0.064                   | NO                   |
| Gln                         | CAG                  | -0.026             | Gln                             | <b><u>CAG</u></b> |           |         |                          |                      |
| Glu                         | <b><u>GAA</u></b>    | <b>+0.125</b>      | Glu                             | GAA               | -0.156    | -0.137  | -0.108                   | NO                   |
| Glu                         | GAG                  | -0.034             | Glu                             | <b><u>GAG</u></b> |           |         |                          |                      |
| Gly                         | <b><u>GGT</u></b>    | <b>+0.116</b>      | Gly                             | GGT               | 0.008     | 0.022   | 0.03                     | NO                   |
| Gly                         | GGC                  | -0.104             | Gly                             | <b><u>GGC</u></b> | 0.095     | 0.069   | 0.067                    |                      |
| Gly                         | GGA                  | -0.077             | Gly                             | GGA               | -0.196    | -0.203  | -0.145                   |                      |
| Gly                         | GGG                  | +0.066             | Gly                             | <b><u>GGG</u></b> | 0.196     | 0.205   | 0.157                    |                      |
| His                         | CAT                  | +0.023             | His                             | CAT               | -0.043    | -0.054  | -0.052                   |                      |
| His                         | <b><u>CAC</u></b> ** | +0.036             | His                             | <b><u>CAC</u></b> |           |         |                          | <b><u>YES</u></b> ** |
| Ile                         | ATT                  | +0.081             | Ile                             | ATT               | -0.089    | -0.059  | -0.087                   |                      |
| Ile                         | <b><u>ATC</u></b>    | <b>+0.083</b>      | Ile                             | <b><u>ATC</u></b> | 0.148     | 0.137   | 0.171                    | <b><u>YES</u></b>    |
| Ile                         | ATA                  | -0.083             | Ile                             | ATA               | -0.043    | -0.065  | -0.078                   |                      |
| Leu                         | TTA                  | -0.128             | Leu                             | TTA               | -0.07     | -0.096  | -0.121                   |                      |
| Leu                         | <b><u>TTG</u></b>    | <b>+0.458</b>      | Leu                             | <b><u>TTG</u></b> | 0.182     | 0.237   | 0.188                    | <b><u>YES</u></b>    |
| Leu                         | CTT                  | -0.096             | Leu                             | CTT               | -0.123    | -0.111  | -0.081                   |                      |
| Leu                         | CTC                  | -0.049             | Leu                             | <b><u>CTC</u></b> | 0.076     | 0.05    | 0.084                    |                      |
| Leu                         | CTA                  | -0.068             | Leu                             | CTA               | -0.013    | -0.019  | 0.0003                   |                      |
| Leu                         | CTG                  | -0.107             | Leu                             | <b><u>CTG</u></b> | 0.059     | 0.055   | 0.06                     |                      |
| Leu                         | AAA                  | -0.000             | Leu                             | AAA               | 0.194     | 0.161   | 0.158                    |                      |



|     |                   |               |     |                   |        |        |        |                   |
|-----|-------------------|---------------|-----|-------------------|--------|--------|--------|-------------------|
| Ser | TCC               | -0.162        | Ser | TCC               | 0.015  | -0.001 | 0.037  |                   |
| Ser | TCA               | +0.082        | Ser | TCA               | -0.041 | -0.039 | -0.048 |                   |
| Ser | TCG               | -0.103        | Ser | <b><u>TCG</u></b> | 0.103  | 0.09   | 0.073  |                   |
| Ser | <b><u>AGT</u></b> | <b>+0.226</b> | Ser | <b><u>AGT</u></b> | 0.071  | 0.108  | 0.075  | <b><u>YES</u></b> |
| Ser | AGC               | -0.138        | Ser | <b><u>AGC</u></b> | 0.056  | 0.045  | 0.06   |                   |
| Thr | <b><u>ACT</u></b> | <b>+0.222</b> | Thr | ACT               | 0.004  | 0.031  | 0.025  | NO                |
| Thr | ACC               | +0.029        | Thr | <b><u>ACC</u></b> | 0.111  | 0.097  | 0.142  |                   |
| Thr | ACA               | -0.012        | Thr | ACA               | -0.12  | -0.119 | -0.123 |                   |
| Thr | ACG               | -0.194        | Thr | <b><u>ACG</u></b> | 0.088  | 0.079  | 0.039  |                   |
| Tyr | TAT               | -0.062        | Tyr | TAT               | -0.094 | -0.107 | -0.124 |                   |
| Tyr | <b><u>TAC</u></b> | <b>+0.197</b> | Tyr | <b><u>TAC</u></b> |        |        |        | <b><u>YES</u></b> |
| Val | <b><u>GTT</u></b> | <b>+0.129</b> | Val | GTT               | -0.049 | -0.031 | -0.038 | NO                |
| Val | GTC               | -0.022        | Val | <b><u>GTC</u></b> | 0.09   | 0.077  | 0.106  |                   |
| Val | GTA               | -0.073        | Val | GTA               | -0.057 | -0.069 | -0.058 |                   |
| Val | GTG               | +0.015        | Val | <b><u>GTG</u></b> | 0.104  | 0.112  | 0.081  |                   |

\* The same optimal codon GCC was found for ovaries and testes when examined individually in the present study.

\*\* The CAC codon is statistically significantly optimal for three of four tissues herein, but not in the summary analyses of all pooled tissues. It is included in comparison of the present optimal codons to the correlation method.

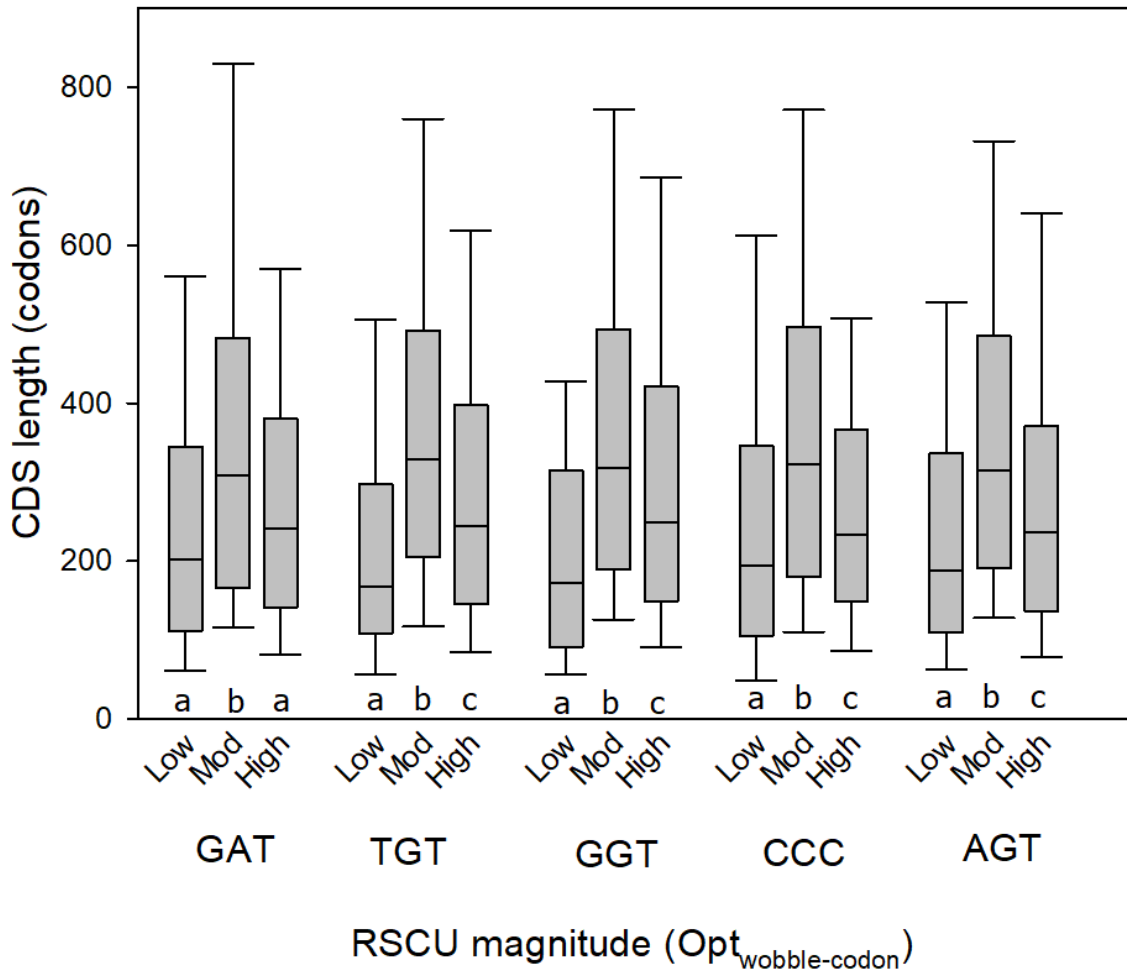

**Figure S1.** The relative use of codons with  $\text{Opt-codon}_{\text{wobble}}$  status (GAT, TGT, GGT, CCC and AGT) in highly expressed genes with respect to CDS length. Different letters below each set of three bars (per codon) indicate a statistically significant difference using Ranked ANOVA and Dunn's paired contrasts ( $P < 0.05$ ). The 822 highly expressed genes were divided into three equal sized classes of RSCU values (low, moderate (mod), high) for each codon.

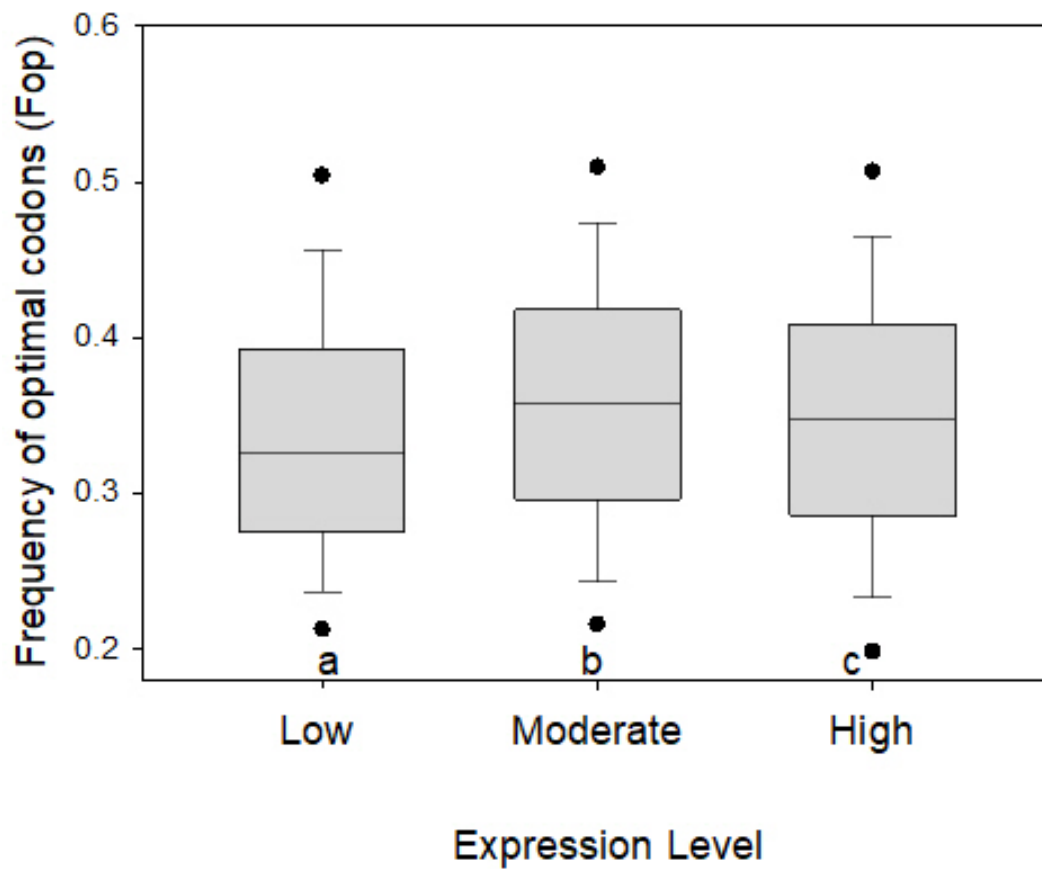

**Figure S2.** The frequency of optimal codons (Fop) across all genes studied in *T. castaneum* when using the primary optimal codons identified in Williford and Demuth.<sup>2</sup> Genes are categorized into low (lowest 5%, FPKM<0.013), moderate (5 to 95%) and high (top 5%) transcription groups (FPKM>103) based on average expression across all four tissue types (testes, ovaries, GT-males, GT-females). Different letters below bars indicate a statistically significant difference using Ranked ANOVA and Dunn's paired contrasts (<0.05).

## Supplementary Text File S1: Protein length and Opt<sub>tRNA</sub> status

For the beetles studied herein, we found that the use of Opt-codon<sub>wobble</sub> codons was connected to protein length. Specifically, for the 822 highly transcribed genes in this organism (top 5%), we ranked the RSCU for each of the five codons with Opt-codon<sub>wobble</sub> status, and genes were then binned into three equal sized categories (N=274 genes each) based on the relative magnitude of RSCU (low, moderate, and high). By definition as an optimal codon, each of these five codons had elevated RSCU in the highly expressed genes (as compared to low expressed genes, Table 1). However, within the highly transcribed gene set, we found that the bin containing moderate RSCU values were consistent linked to longer CDS than those with the lowest or highest RSCU values for each of the five Opt-codon<sub>wobble</sub> codons, namely GAT, TGT, GGT, CCC and AGT (Ranked ANOVA and Dunn's paired contrast  $P < 0.05$ , Fig. S1). Thus, the highly transcribed CDS encoding long proteins, appear to be connected to a specific frequency of Opt-codon<sub>wobble</sub> codons, which may play a role in their translation. This may possibly comprise a mechanism to ensure a balance between high translation rates (ensured by moderate rather than highest usage of Opt-codon<sub>wobble</sub> codons) and allowing intermittent pausing during translation for accurate protein synthesis and/or protein folding (ensured by their moderate, rather than low, usage) of CDS encoding long proteins.

### Supplementary References

1. Whittle, C. A., Kulkarni, A. and Extavour, C. G. 2019, Absence of a faster-X effect in beetles (*Tribolium*, Coleoptera). *BioRxiv*; <https://doi.org/10.1101/754903>
2. Williford, A. and Demuth, J. P. 2012, Gene expression levels are correlated with synonymous codon usage, amino acid composition, and gene architecture in the red flour beetle, *Tribolium castaneum*. *Mol Biol Evol*, **29**, 3755-3766.
